# Supplementary material for: Design of a simple and efficient synthesis for bioactive novel pyrazolyl–isoxazoline hybrids
Source: Royal Society of Chemistry journal article supplement (doi:10.1039/c9nj01532a), 2019-01-01
Supplement: c9nj01532a1.pdf [file c9nj01532a1.pdf]

## Supporting Informations

### Design, simple and efficient synthesis of bio active novel pyrazolyl-isoxazoline hybrids

Balakrishnan Sankar, Muniyasamy Harikrishnan, Renganathan Raja, Velu Sadhasivam, Nelson Malini, Sepperumal Murugesan, Ayyanar Siva\*

Supramolecular and Organometallic Chemistry Lab, Department of Inorganic Chemistry, School of Chemistry, Madurai Kamaraj University Madurai-21.

Corresponding author Email ([drasiva@gmail.com](mailto:drasiva@gmail.com) and [siva.chem@mkuniversity.org](mailto:siva.chem@mkuniversity.org))

### Supporting Information

| S.No. | Contents                                                     | Page No. |
|-------|--------------------------------------------------------------|----------|
| 1     | <b>Figure S1.</b> $^1\text{H}$ NMR spectrum of <b>6a</b>     | 4        |
| 2     | <b>Figure S2.</b> $^{13}\text{C}$ NMR spectrum of <b>6a</b>  | 4        |
| 3     | <b>Figure S3.</b> ESI-MS spectrum of <b>6a</b>               | 5        |
| 4     | <b>Figure S4.</b> $^1\text{H}$ NMR spectrum of <b>6b</b>     | 5        |
| 5     | <b>Figure S5.</b> $^{13}\text{C}$ NMR spectrum of <b>6b</b>  | 6        |
| 6     | <b>Figure S6.</b> ESI-MS spectrum of <b>6b</b>               | 6        |
| 7     | <b>Figure S7.</b> $^1\text{H}$ NMR spectrum of <b>6c</b>     | 7        |
| 8     | <b>Figure S8.</b> $^{13}\text{C}$ NMR spectrum of <b>6c</b>  | 7        |
| 9     | <b>Figure S9.</b> ESI-MS spectrum of <b>6c</b>               | 8        |
| 10    | <b>Figure S10.</b> $^1\text{H}$ NMR spectrum of <b>6d</b>    | 8        |
| 11    | <b>Figure S11.</b> $^{13}\text{C}$ NMR spectrum of <b>6d</b> | 9        |
| 12    | <b>Figure S12.</b> ESI-MS spectrum of <b>6d</b>              | 9        |
| 13    | <b>Figure S13.</b> $^1\text{H}$ NMR spectrum of <b>6e</b>    | 10       |
| 14    | <b>Figure S14.</b> $^{13}\text{C}$ NMR spectrum of <b>6e</b> | 10       |

|    |                                                              |    |
|----|--------------------------------------------------------------|----|
| 15 | <b>Figure S15.</b> ESI-MS spectrum of <b>6e</b>              | 11 |
| 16 | <b>Figure S16.</b> <sup>1</sup> H NMR spectrum of <b>6f</b>  | 11 |
| 17 | <b>Figure S17.</b> <sup>13</sup> C NMR spectrum of <b>6f</b> | 12 |
| 18 | <b>Figure S18.</b> ESI-MS spectrum of <b>6f</b>              | 12 |
| 19 | <b>Figure S19.</b> <sup>1</sup> H NMR spectrum of <b>6g</b>  | 13 |
| 20 | <b>Figure S20.</b> <sup>13</sup> C NMR spectrum of <b>6g</b> | 13 |
| 21 | <b>Figure S21.</b> ESI-MS spectrum of <b>6g</b>              | 14 |
| 22 | <b>Figure S22.</b> <sup>1</sup> H NMR spectrum of <b>6h</b>  | 14 |
| 23 | <b>Figure S23.</b> <sup>13</sup> C NMR spectrum of <b>6h</b> | 15 |
| 24 | <b>Figure S24.</b> ESI-MS spectrum of <b>6h</b>              | 15 |
| 25 | <b>Figure S25.</b> <sup>1</sup> H NMR spectrum of <b>6i</b>  | 16 |
| 26 | <b>Figure S26.</b> <sup>13</sup> C NMR spectrum of <b>6i</b> | 16 |
| 27 | <b>Figure S27.</b> ESI-MS spectrum of <b>6i</b>              | 17 |
| 28 | <b>Figure S28.</b> <sup>1</sup> H NMR spectrum of <b>6j</b>  | 17 |
| 29 | <b>Figure S29.</b> <sup>13</sup> C NMR spectrum of <b>6j</b> | 18 |
| 30 | <b>Figure S30.</b> ESI-MS spectrum of <b>6j</b>              | 18 |
| 31 | <b>Figure S31.</b> <sup>1</sup> H NMR spectrum of <b>6k</b>  | 19 |
| 32 | <b>Figure S32.</b> <sup>13</sup> C NMR spectrum of <b>6k</b> | 19 |
| 33 | <b>Figure S33.</b> ESI-MS spectrum of <b>6k</b>              | 20 |
| 34 | <b>Figure S34.</b> <sup>1</sup> H NMR spectrum of <b>6l</b>  | 20 |
| 35 | <b>Figure S35.</b> <sup>13</sup> C NMR spectrum of <b>6l</b> | 21 |
| 36 | <b>Figure S36.</b> ESI-MS spectrum of <b>6l</b>              | 21 |
| 37 | <b>Figure S37.</b> <sup>1</sup> H NMR spectrum of <b>6m</b>  | 22 |
| 38 | <b>Figure S38.</b> <sup>13</sup> C NMR spectrum of <b>6m</b> | 22 |
| 39 | <b>Figure S39.</b> ESI-MS spectrum of <b>6m</b>              | 23 |
| 40 | <b>Figure S40.</b> <sup>1</sup> H NMR spectrum of <b>6n</b>  | 23 |
| 41 | <b>Figure S41.</b> <sup>13</sup> C NMR spectrum of <b>6n</b> | 24 |
| 42 | <b>Figure S42.</b> ESI-MS spectrum of <b>6n</b>              | 24 |
| 43 | <b>Figure S43.</b> <sup>1</sup> H NMR spectrum of <b>6o</b>  | 25 |
| 44 | <b>Figure S44.</b> <sup>13</sup> C NMR spectrum of <b>6o</b> | 25 |

|    |                                                              |    |
|----|--------------------------------------------------------------|----|
| 45 | <b>Figure S45.</b> ESI-MS spectrum of <b>6o</b>              | 26 |
| 46 | <b>Figure S46.</b> <sup>1</sup> H NMR spectrum of <b>6p</b>  | 26 |
| 47 | <b>Figure S47.</b> <sup>13</sup> C NMR spectrum of <b>6p</b> | 27 |
| 48 | <b>Figure S48.</b> ESI-MS spectrum of <b>6p</b>              | 27 |
| 49 | <b>Figure S49.</b> <sup>1</sup> H NMR spectrum of <b>6q</b>  | 28 |
| 50 | <b>Figure S50.</b> <sup>13</sup> C NMR spectrum of <b>6q</b> | 28 |
| 51 | <b>Figure S51.</b> ESI-MS spectrum of <b>6q</b>              | 29 |
| 52 | <b>Figure S52.</b> <sup>1</sup> H NMR spectrum of <b>6r</b>  | 29 |
| 53 | <b>Figure S53.</b> <sup>13</sup> C NMR spectrum of <b>6r</b> | 30 |
| 54 | <b>Figure S54.</b> ESI-MS spectrum of <b>6r</b>              | 30 |
| 55 | <b>Figure S55.</b> <sup>1</sup> H NMR spectrum of <b>6s</b>  | 31 |
| 56 | <b>Figure S56.</b> <sup>13</sup> C NMR spectrum of <b>6s</b> | 31 |
| 57 | <b>Figure S57.</b> ESI-MS spectrum of <b>6s</b>              | 32 |

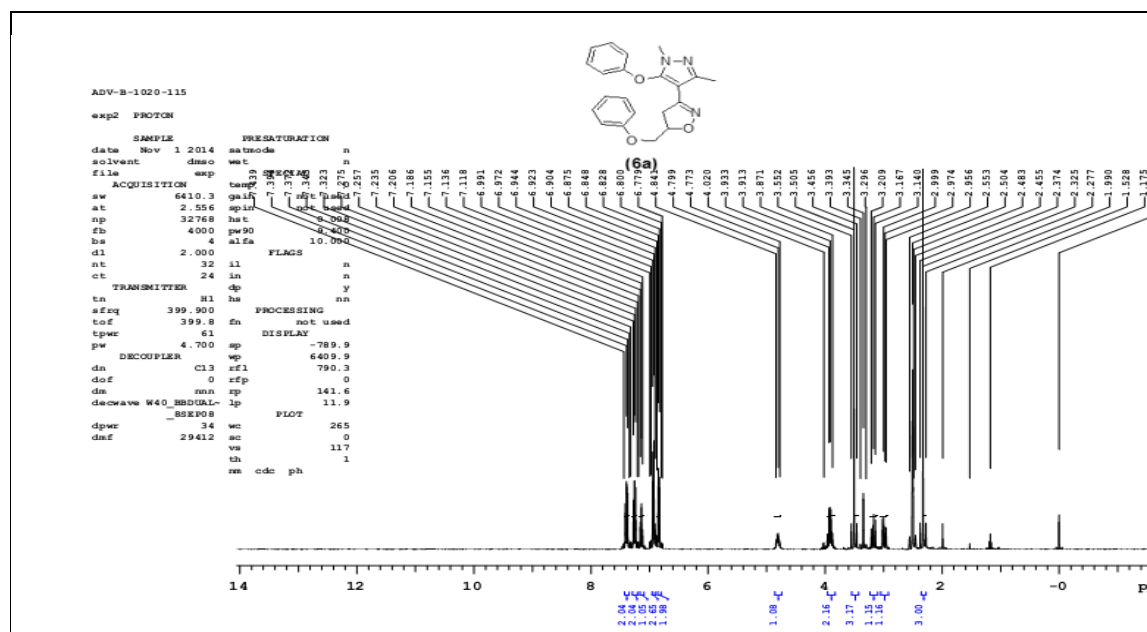

Fig. S1.  $^1\text{H}$  NMR (300 MHz,  $\text{DMSO-}d_6$ ): 3-(1,3-dimethyl-5-phenoxy-1H-pyrazol-4-yl)-5-(phoxymethyl)-4,5-dihydroisoxazole (6a)

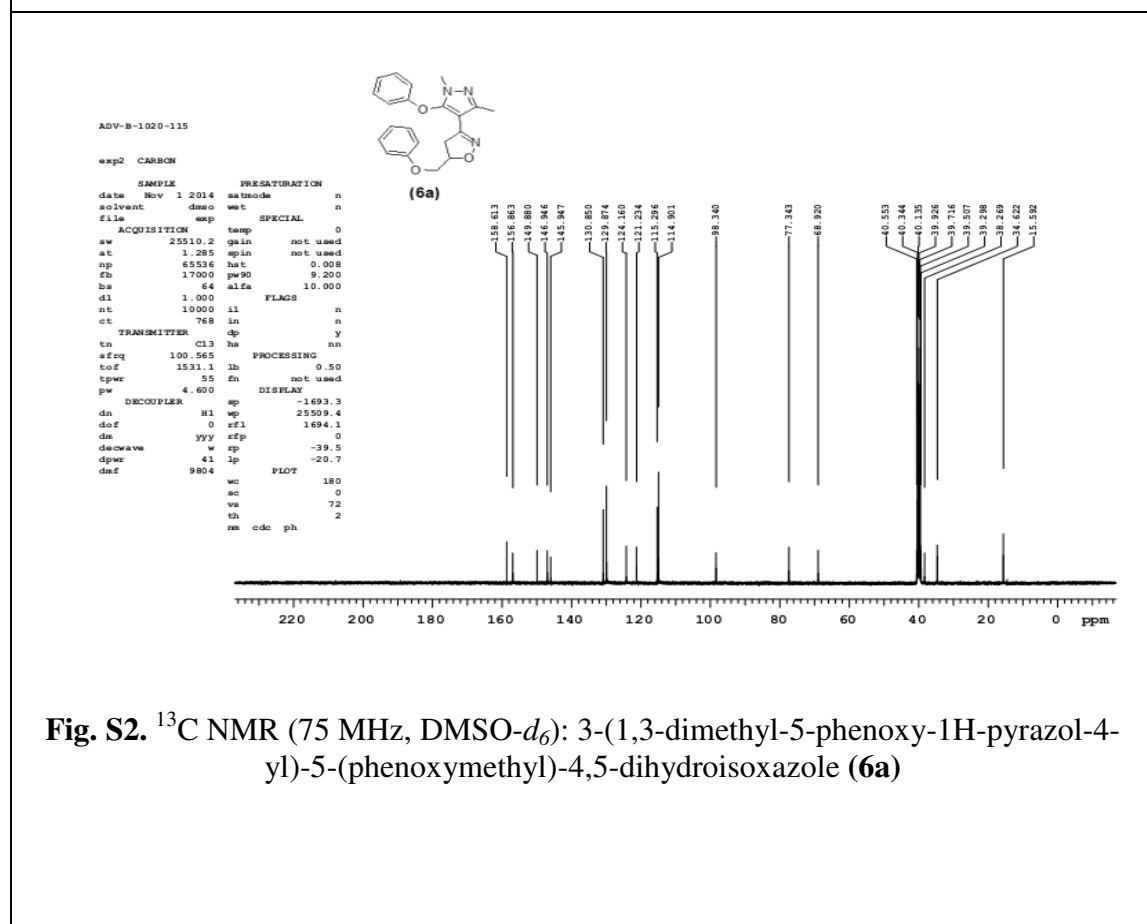

Fig. S2.  $^{13}\text{C}$  NMR (75 MHz,  $\text{DMSO-}d_6$ ): 3-(1,3-dimethyl-5-phenoxy-1H-pyrazol-4-yl)-5-(phoxymethyl)-4,5-dihydroisoxazole (6a)



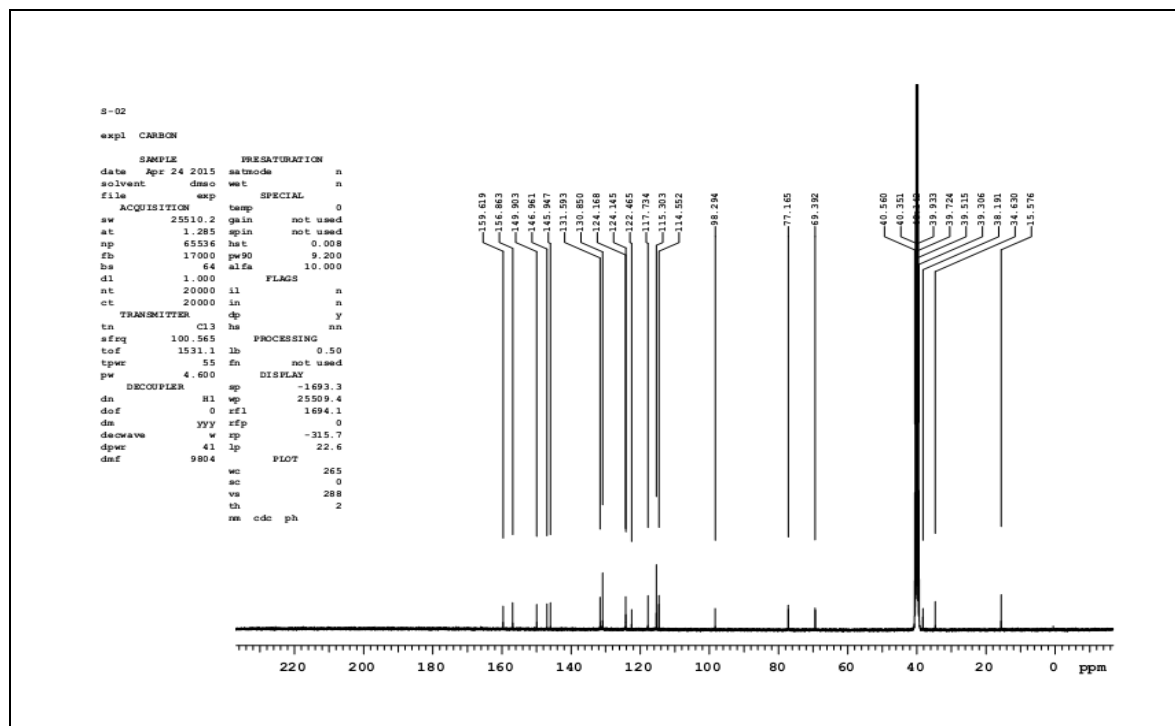

Fig. S5.  $^{13}\text{C}$  NMR (75 MHz, DMSO- $d_6$ ): 5-((3-bromophenoxy)methyl)-3-(1,3-dimethyl-5-phenoxy-1H-pyrazol-4-yl)-4,5-dihydro isoxazole (**6b**)

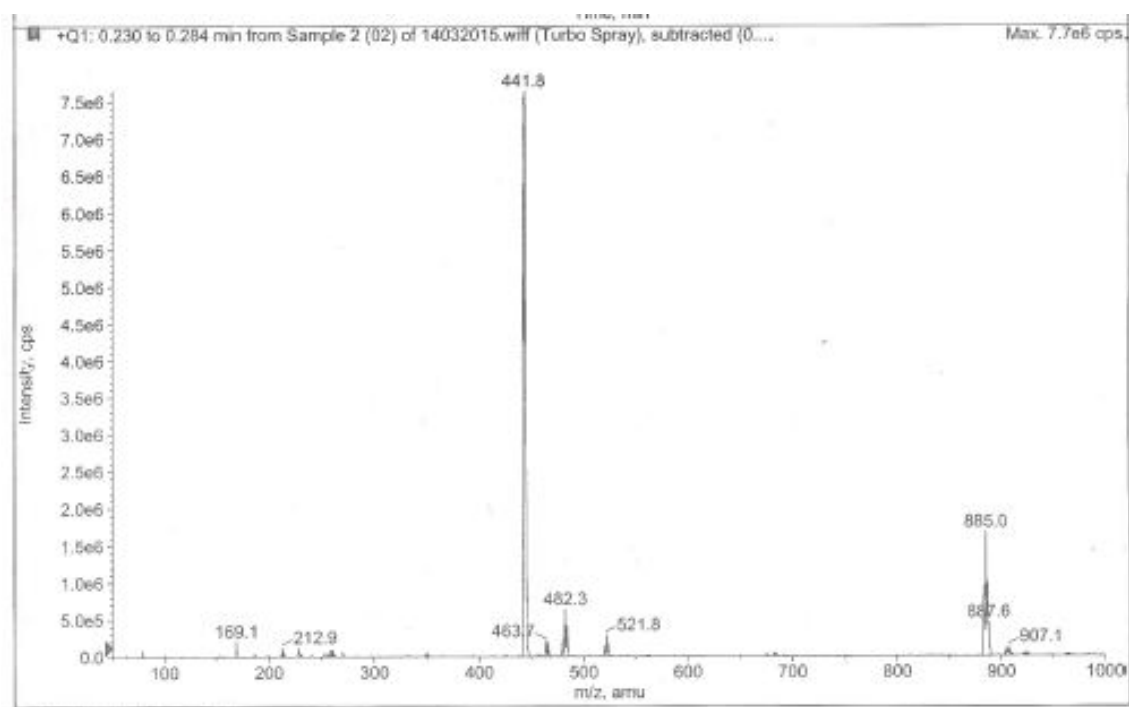

Fig. S6. ESI-MS spectra of the compound **6b**



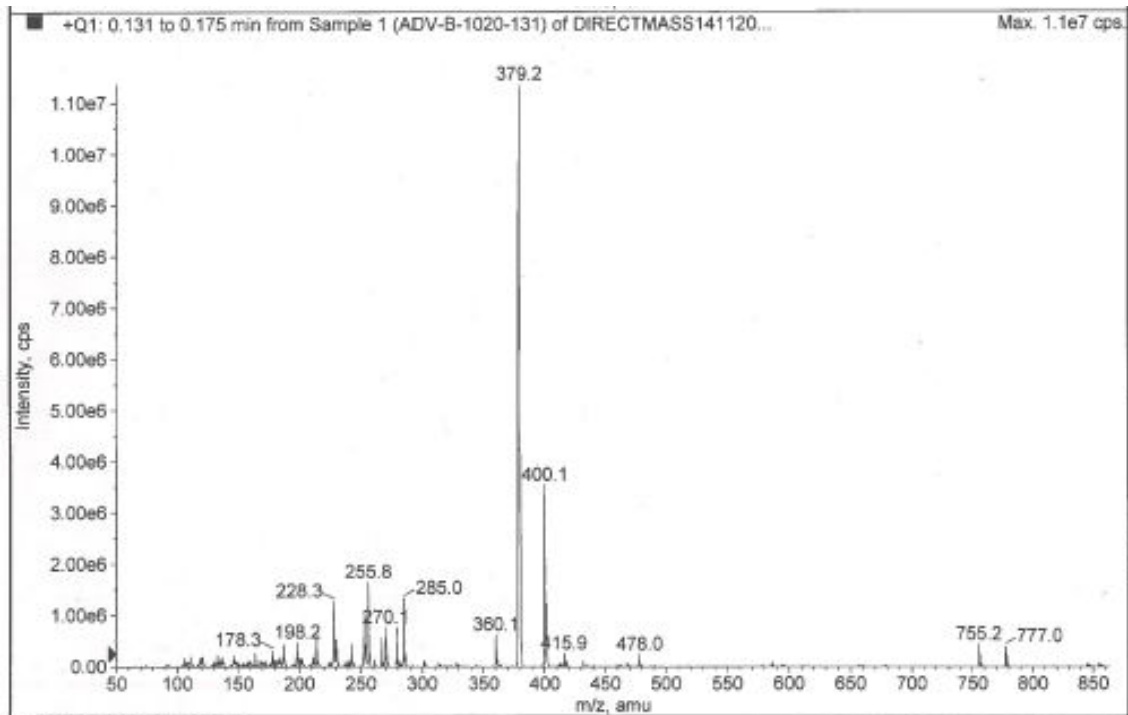

Fig. S9. ESI-MS spectra of the compound **6c**

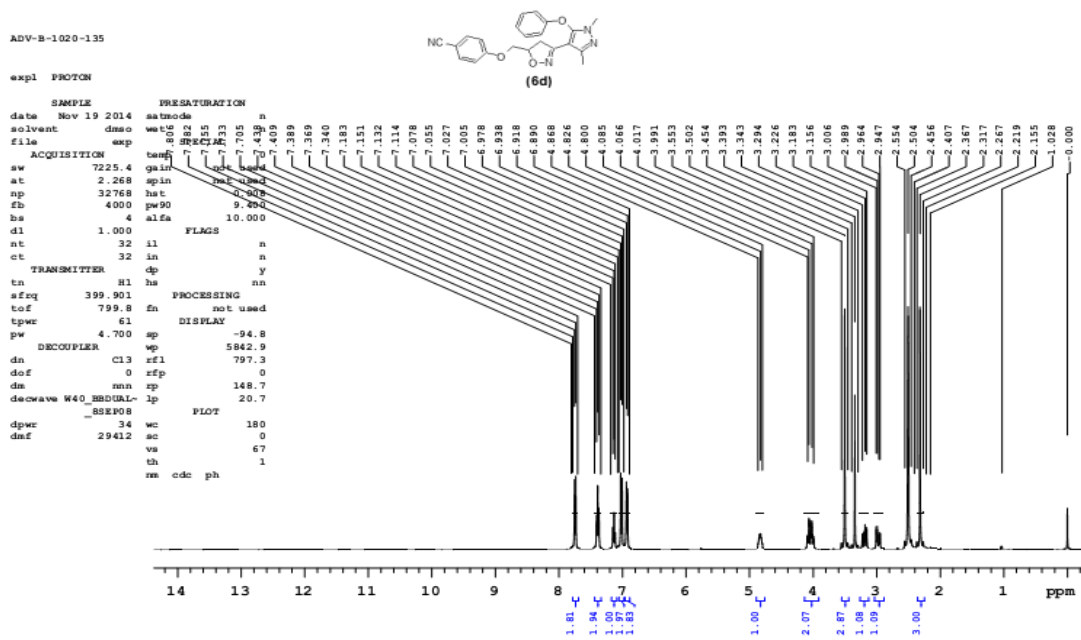

Fig. S10.  $^1\text{H}$  NMR (300 MHz,  $\text{DMSO-}d_6$ ): 4-((3-(1,3-dimethyl-5-phenoxy-1H-pyrazol-4-yl)-4,5-dihydroisoxazol-5-yl)methoxy) benzonitrile (**6d**)



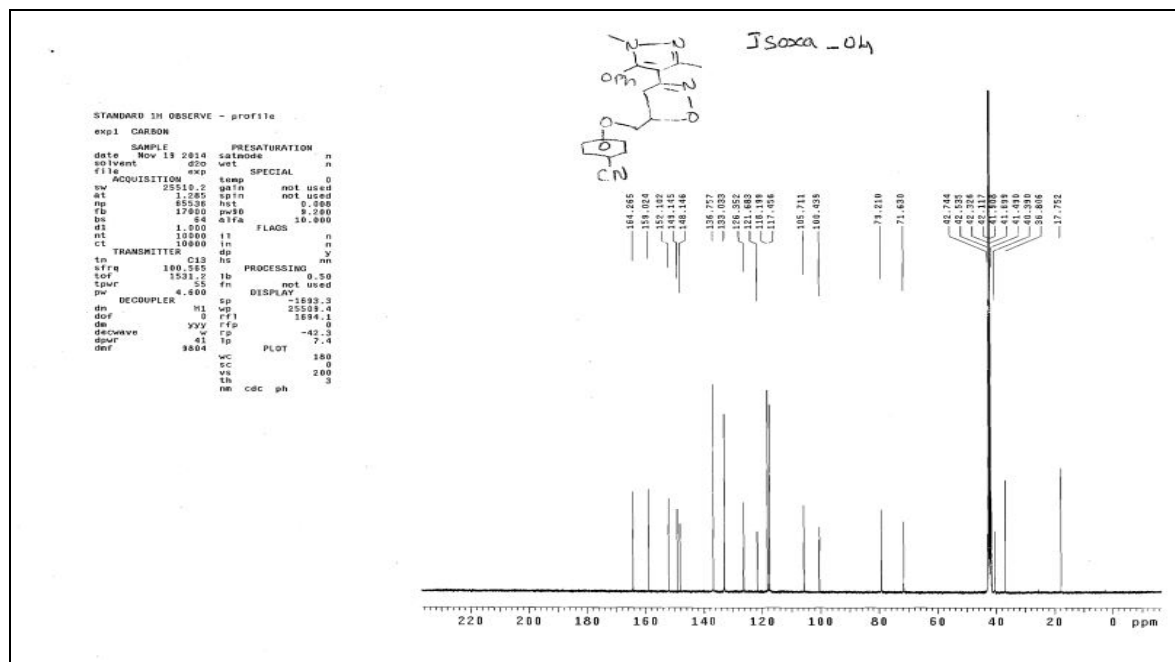

**Fig. S11.**  $^{13}\text{C}$  NMR (75 MHz,  $\text{DMSO-}d_6$ ): 4-((3-(1,3-dimethyl-5-phenoxy-1H-pyrazol-4-yl)-4,5-dihydroisoxazol-5-yl)methoxy) benzonitrile (**6d**)

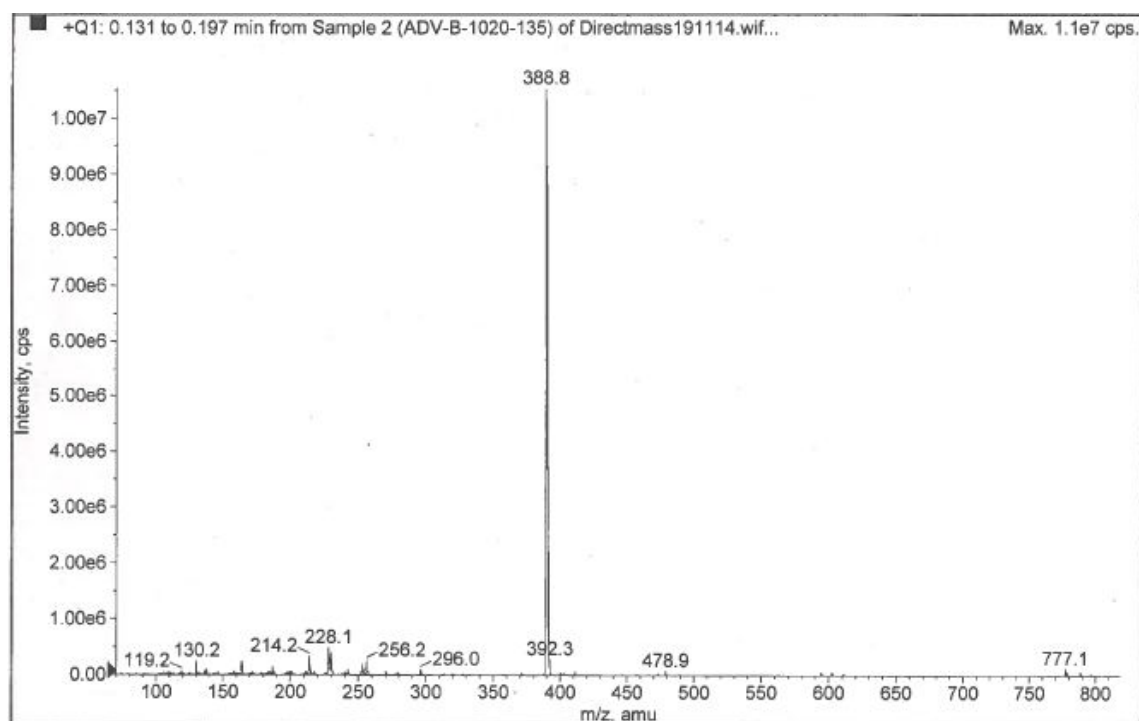

**Fig. S12.** ESI-MS spectra of the compound **6d**



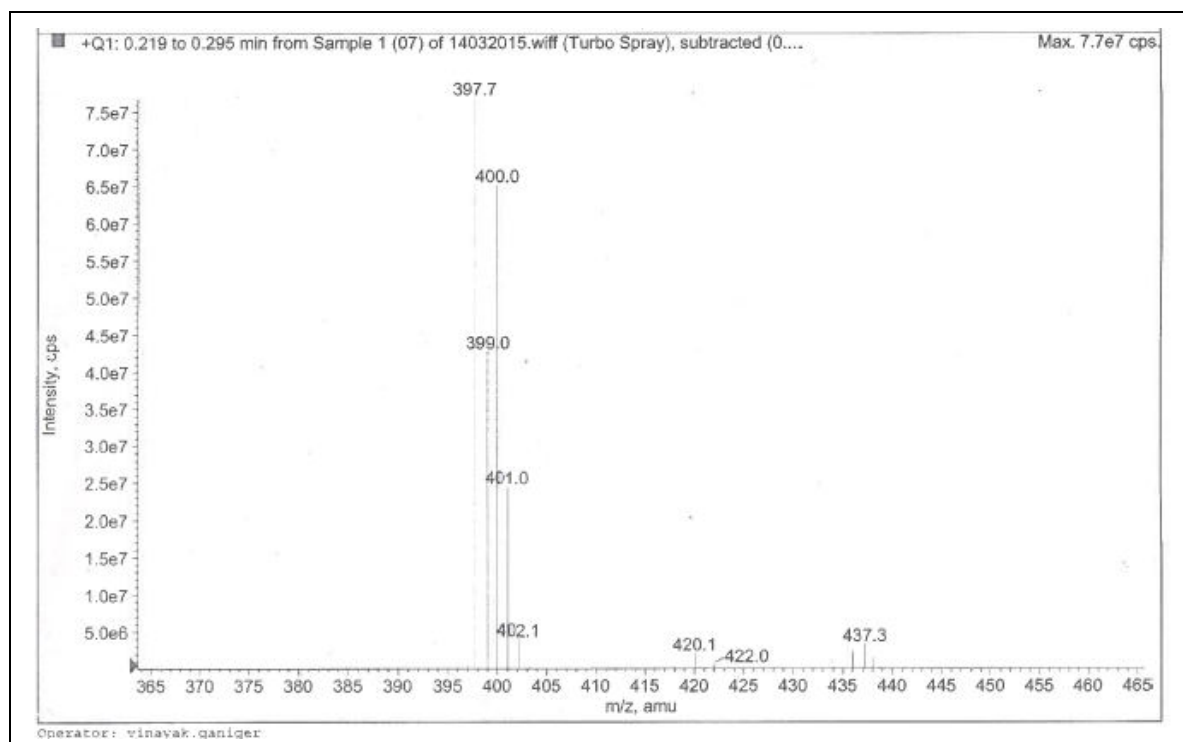

**Fig. S15.** ESI-MS spectra of the compound **6e**

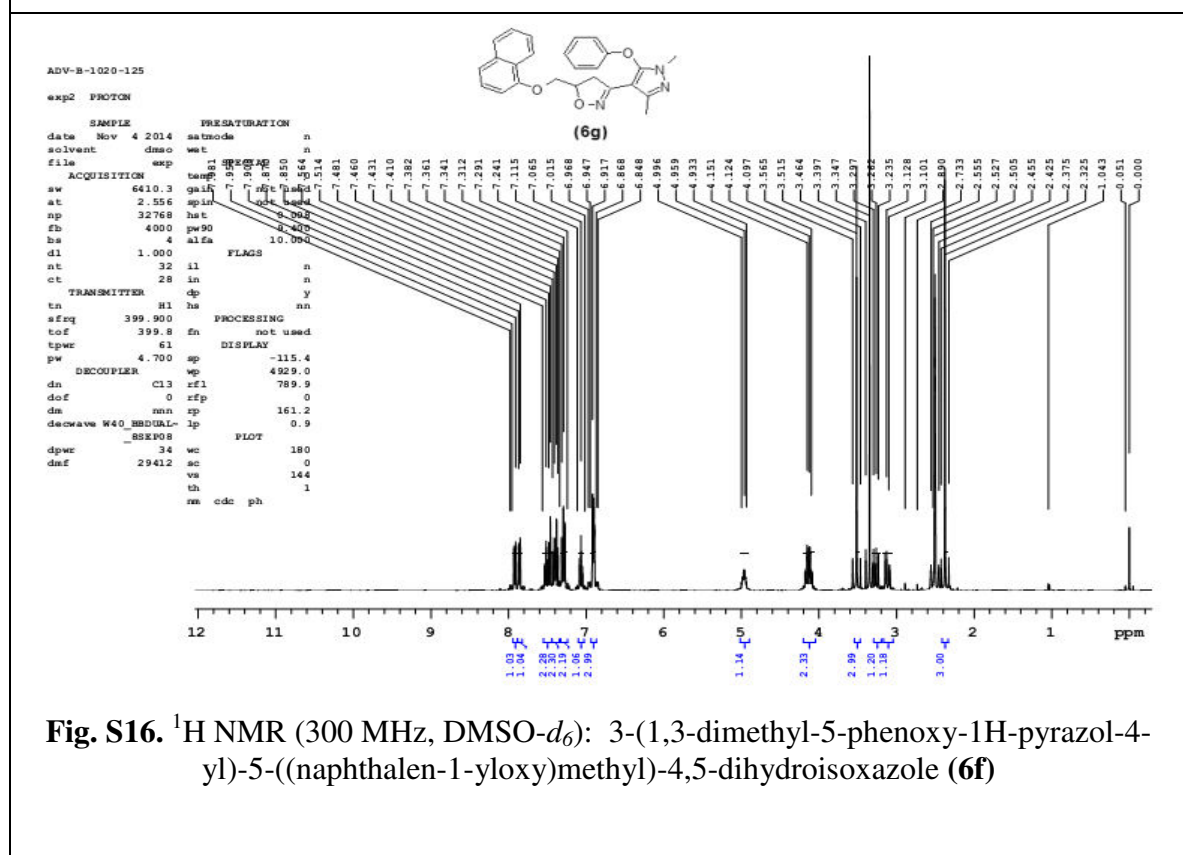

**Fig. S16.**  $^1\text{H}$  NMR (300 MHz,  $\text{DMSO-}d_6$ ): 3-(1,3-dimethyl-5-phenoxy-1H-pyrazol-4-yl)-5-((naphthalen-1-yloxy)methyl)-4,5-dihydroisoxazole (**6f**)

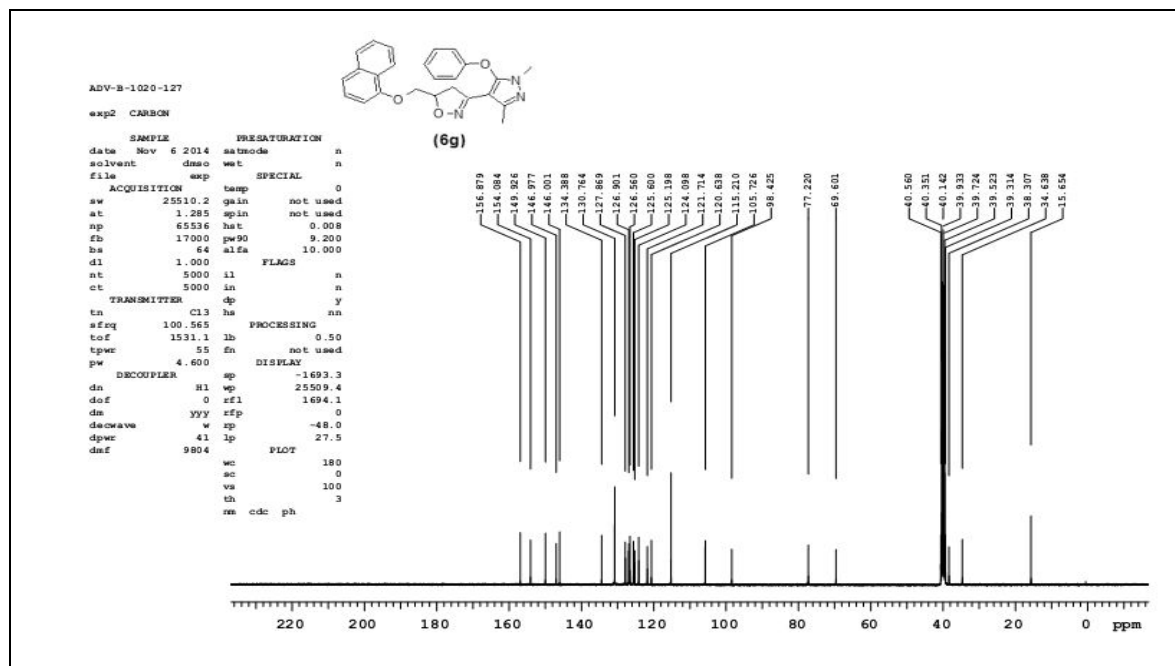

**Fig. S17.**  $^{13}\text{C}$  NMR (75 MHz,  $\text{DMSO-}d_6$ ): 3-(1,3-dimethyl-5-phenoxy-1H-pyrazol-4-yl)-5-((naphthalen-1-yloxy)methyl)-4,5-dihydroisoxazole (**6f**)

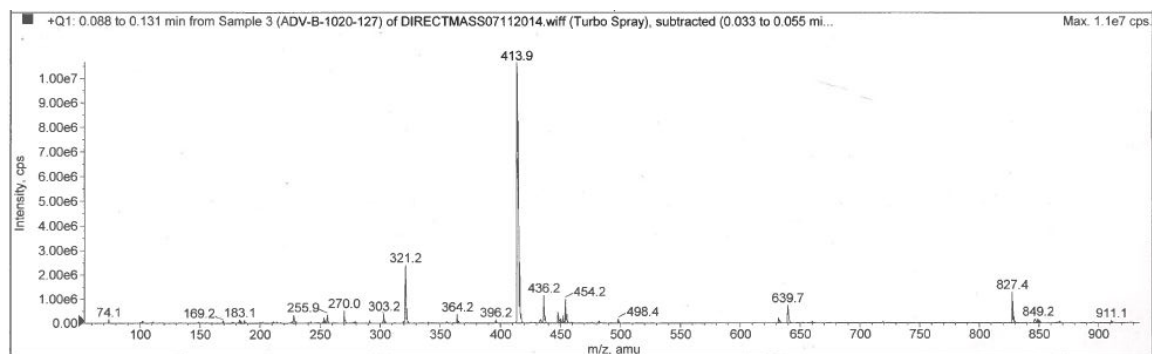

**Fig. S18.** ESI-MS spectra of the compound **6f**

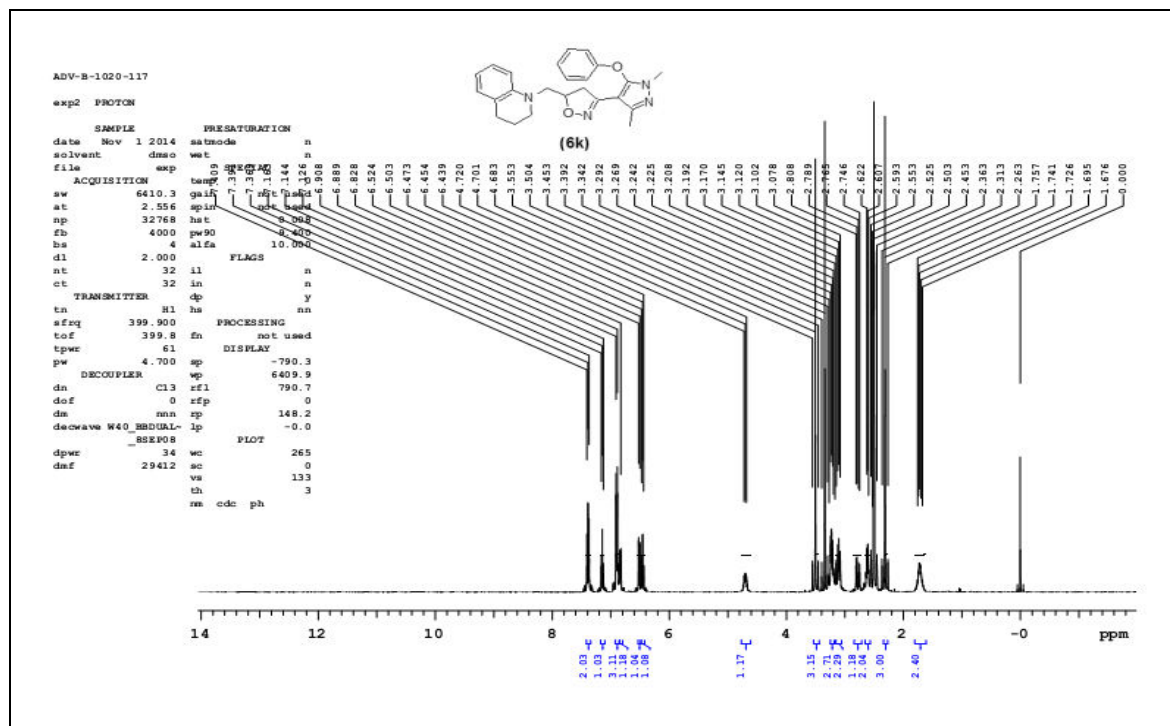

**Fig. S19.**  $^1\text{H}$  NMR (300 MHz,  $\text{DMSO-}d_6$ ): N-((3-(1,3-dimethyl-5-phenoxy-1H-pyrazol-4-yl)-4,5-dihydroisoxazol-5-yl)methyl)-1,4,4a,8a-tetrahydronaphthalen-1-amine (**6g**)

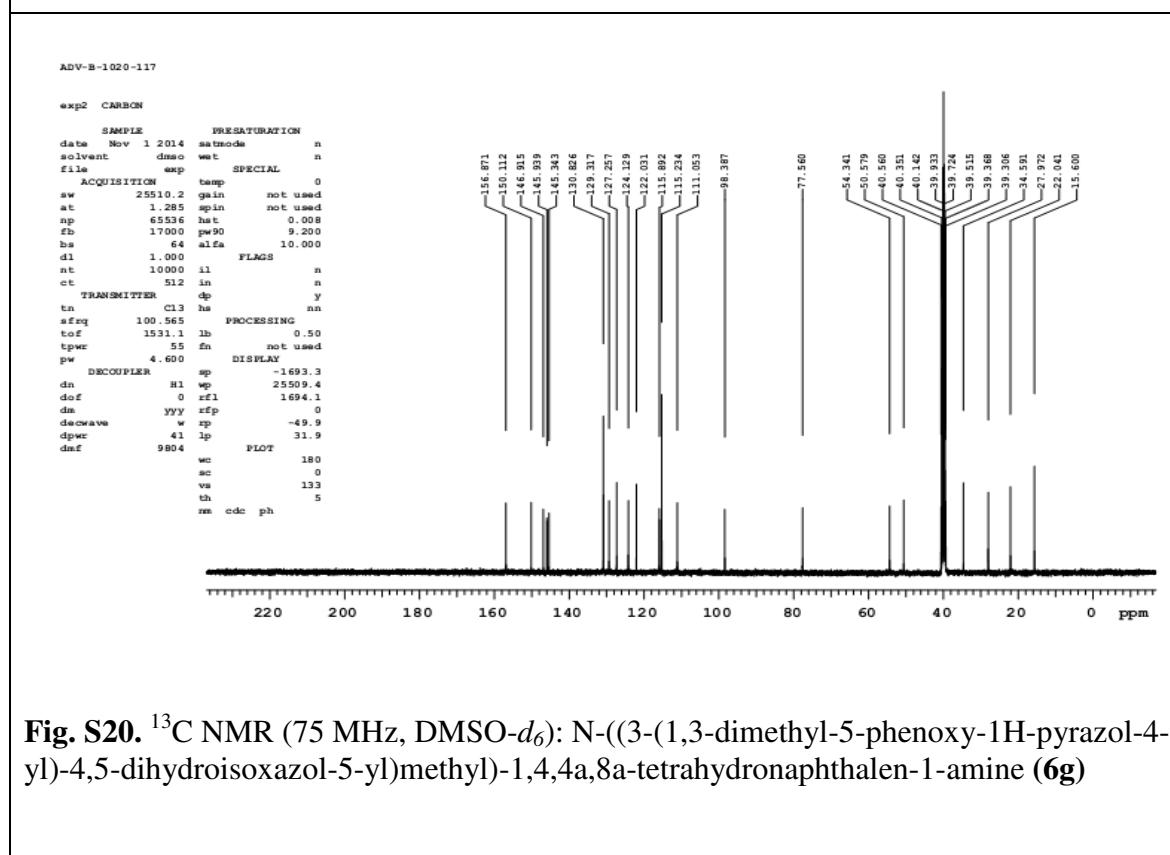

**Fig. S20.**  $^{13}\text{C}$  NMR (75 MHz,  $\text{DMSO-}d_6$ ): N-((3-(1,3-dimethyl-5-phenoxy-1H-pyrazol-4-yl)-4,5-dihydroisoxazol-5-yl)methyl)-1,4,4a,8a-tetrahydronaphthalen-1-amine (**6g**)



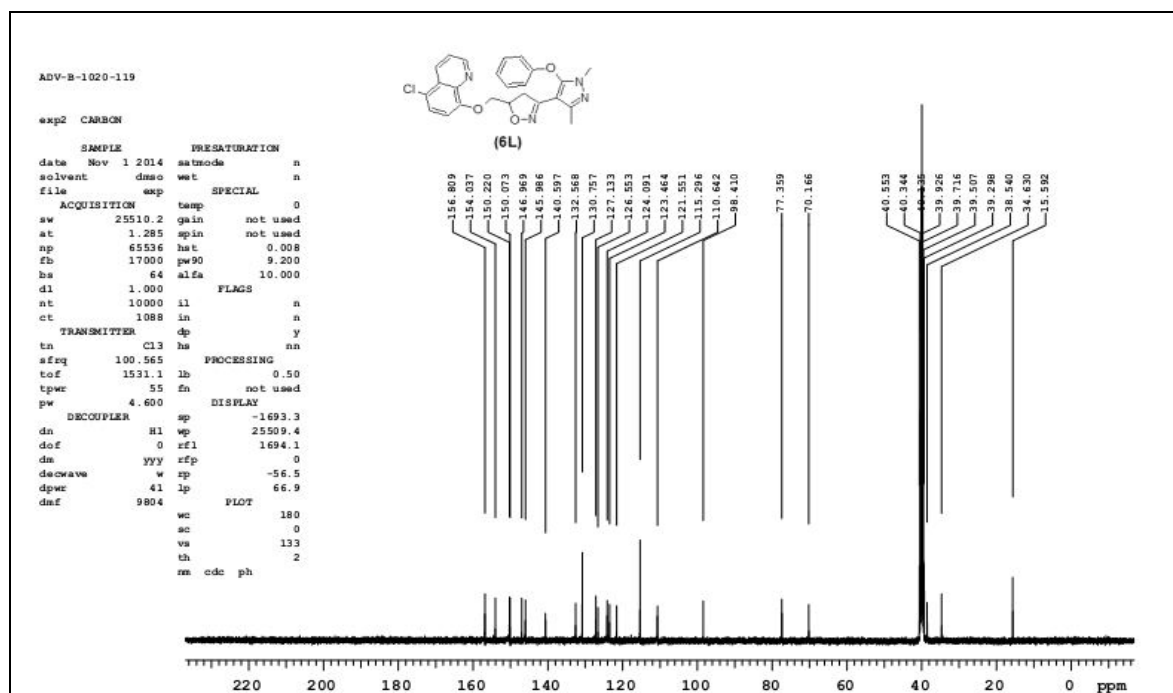

**Fig. S23.**  $^{13}\text{C}$  NMR (75 MHz,  $\text{DMSO-}d_6$ ): 5-(((5-chloroquinolin-8-yl)oxy)methyl)-3-(1,3-dimethyl-5-phenoxy-1H-pyrazol-4-yl)-4,5-dihydroisoxazole (**6h**)

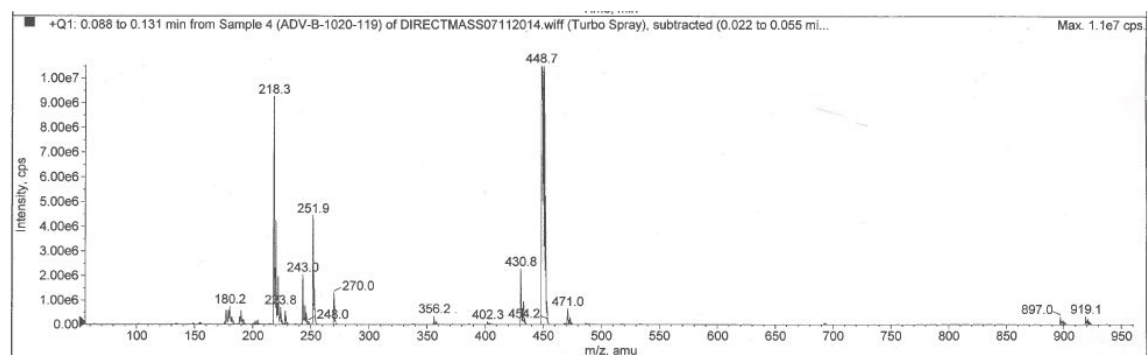

**Fig. S24.** ESI-MS spectra of the compound **6h**



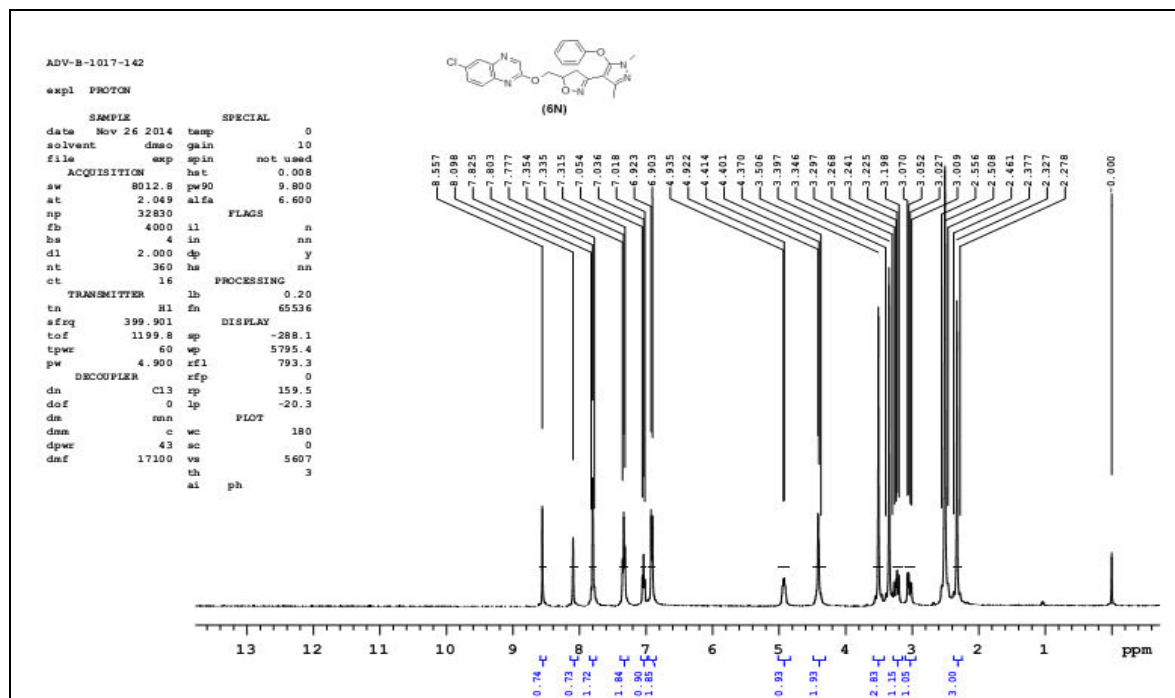

**Fig. S25.**  $^1\text{H}$  NMR (300 MHz,  $\text{DMSO-}d_6$ ): 5-(((6-chloroquinoxalin-2-yl)oxy)methyl)-3-(1,3-dimethyl-5-phenoxy-1H-pyrazol-4-yl)-4,5-dihydroisoxazole (**6i**)

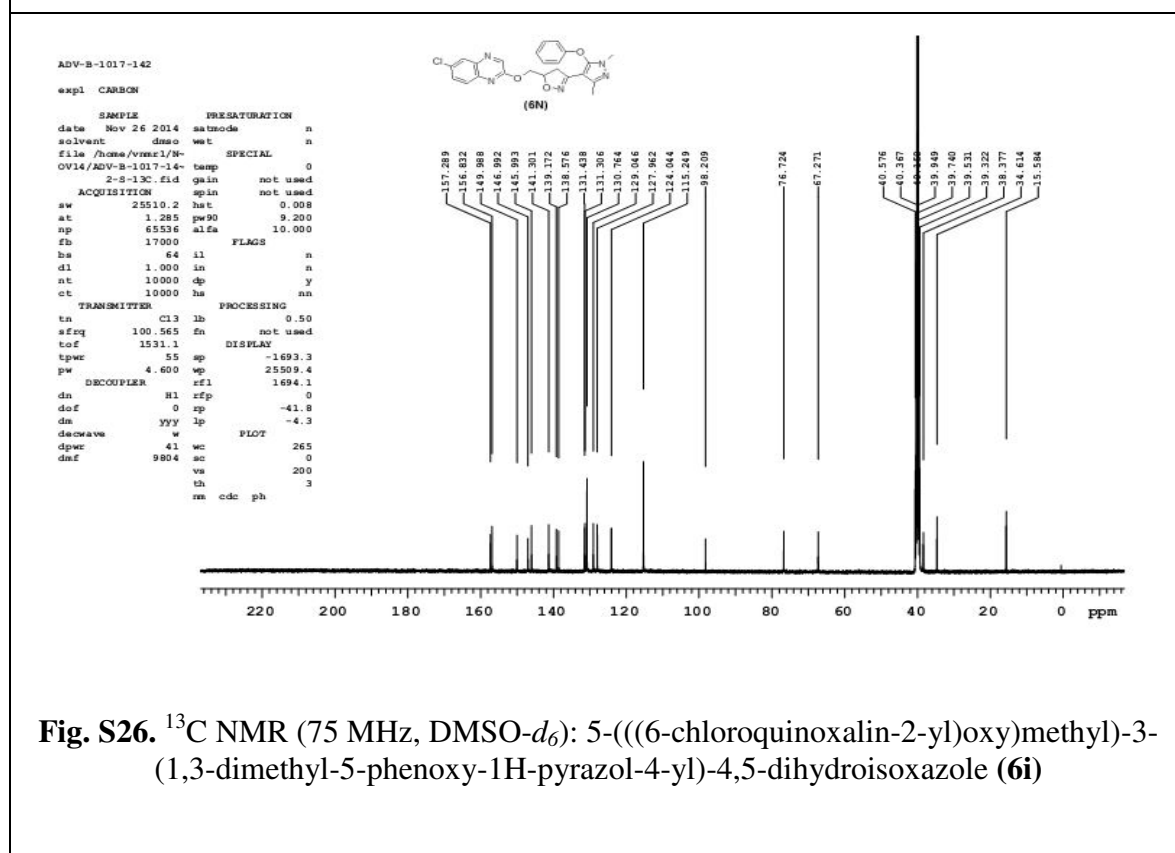

**Fig. S26.**  $^{13}\text{C}$  NMR (75 MHz,  $\text{DMSO-}d_6$ ): 5-(((6-chloroquinoxalin-2-yl)oxy)methyl)-3-(1,3-dimethyl-5-phenoxy-1H-pyrazol-4-yl)-4,5-dihydroisoxazole (**6i**)



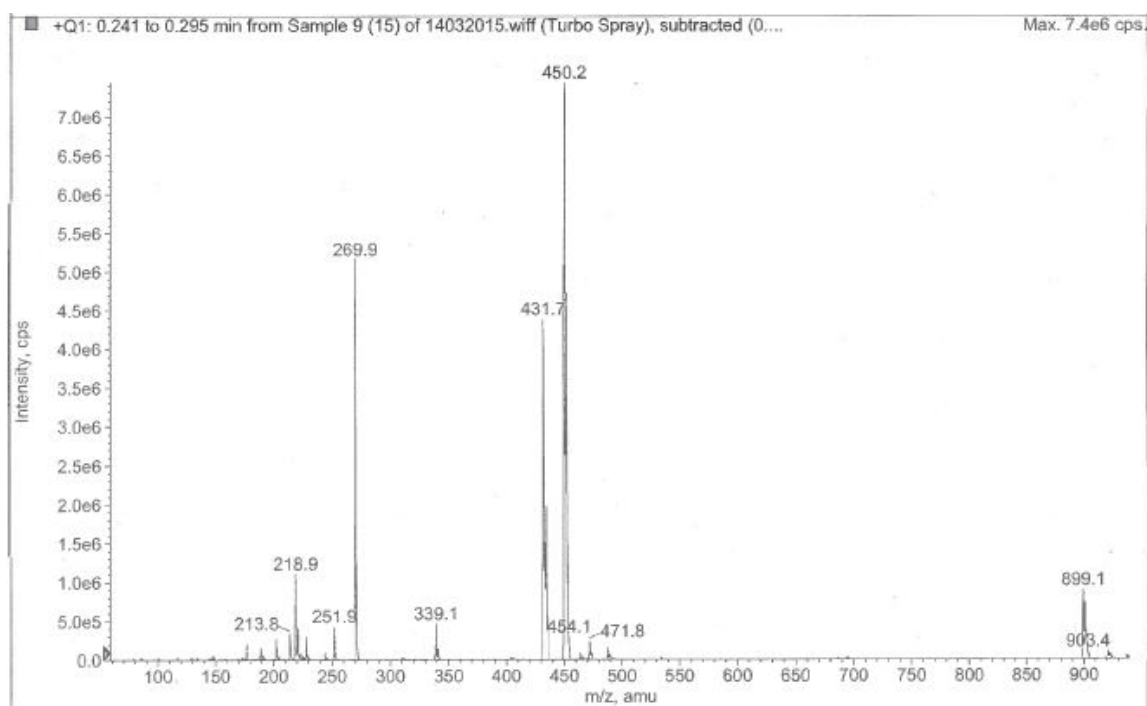

Fig. S27. ESI-MS spectra of the compound **6i**

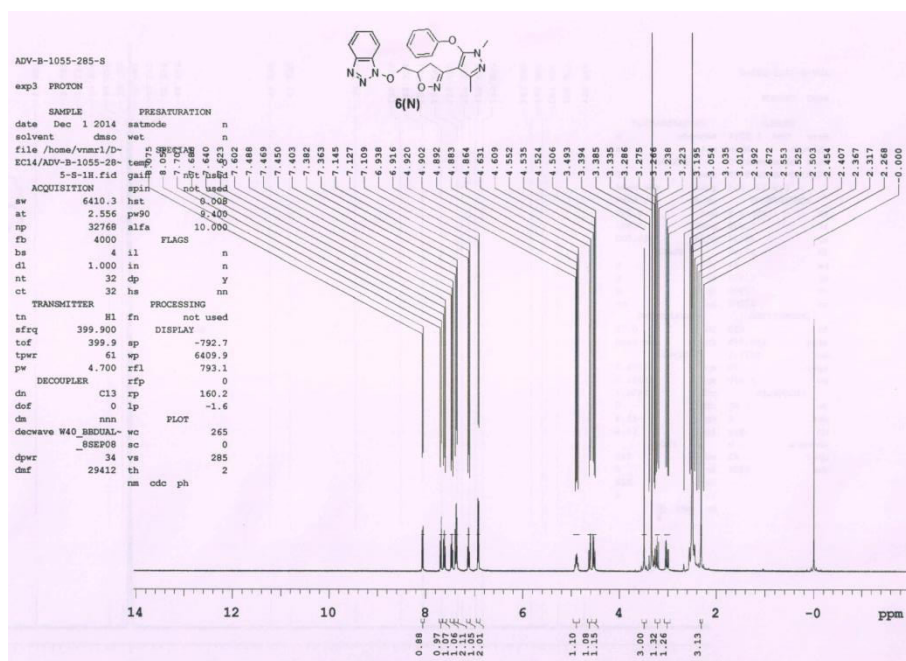

Fig. S28. <sup>1</sup>H NMR (300 MHz, DMSO-*d*<sub>6</sub>): 5-((1H-benzo[d][1,2,3]triazol-1-yloxy)methyl)-3-(1,3-dimethyl-5-phenoxy-1H-pyrazol-4-yl)-4,5-dihydroisoxazole (**6j**)

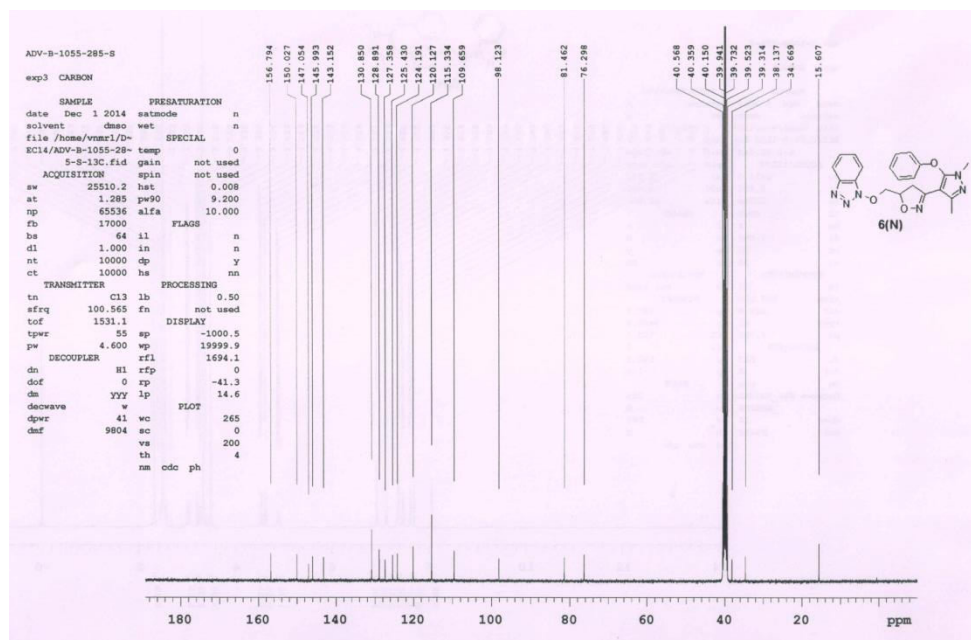

**Fig. S29.**  $^{13}\text{C}$  NMR (75 MHz,  $\text{DMSO-}d_6$ ): 5-((1H-benzo[d][1,2,3]triazol-1-yloxy)methyl)-3-(1,3-dimethyl-5-phenoxy-1H-pyrazol-4-yl)-4,5-dihydroisoxazole (**6j**)

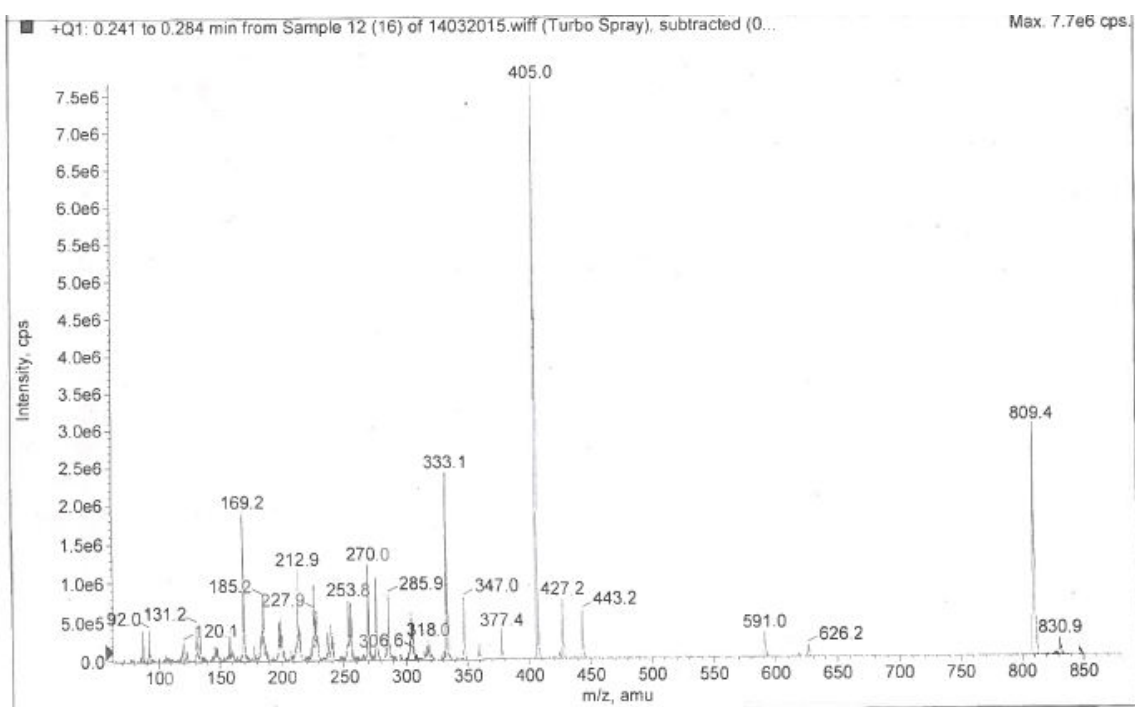

**Fig. 30.** ESI-MS spectra of the compound **6j**

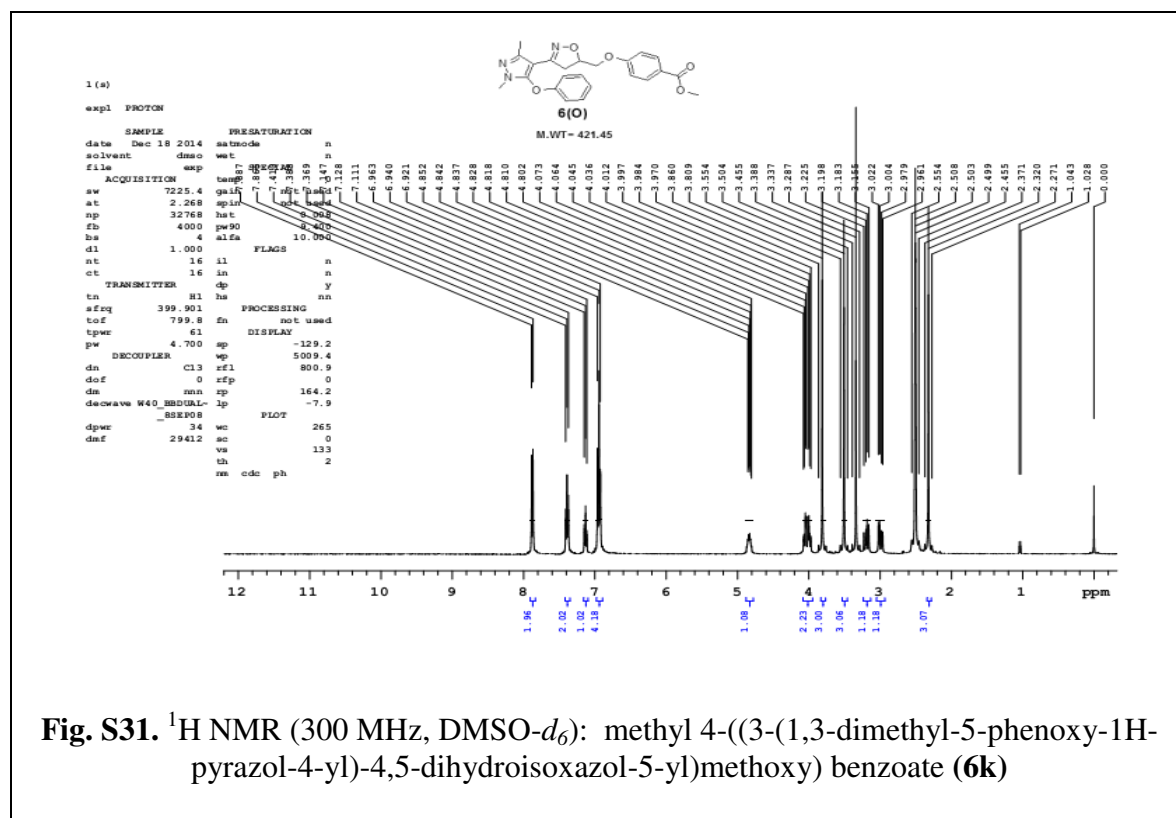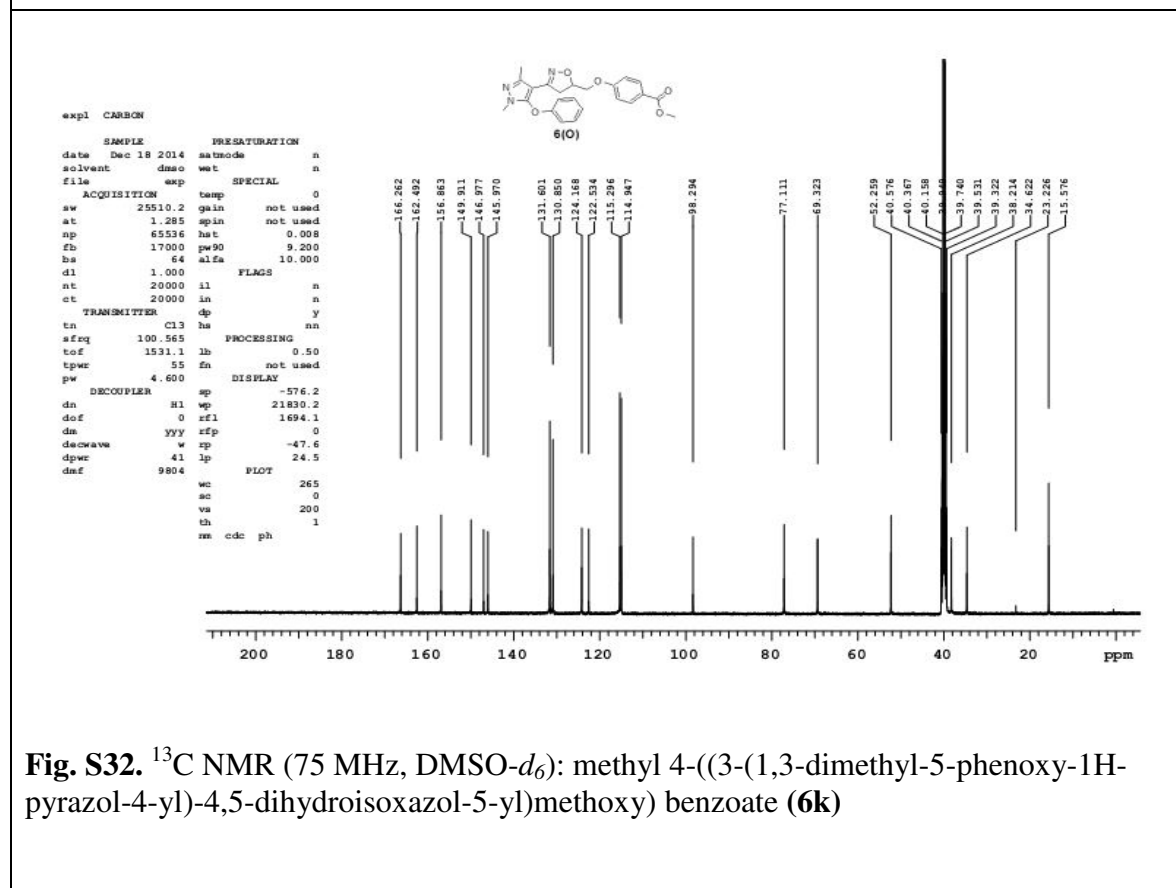



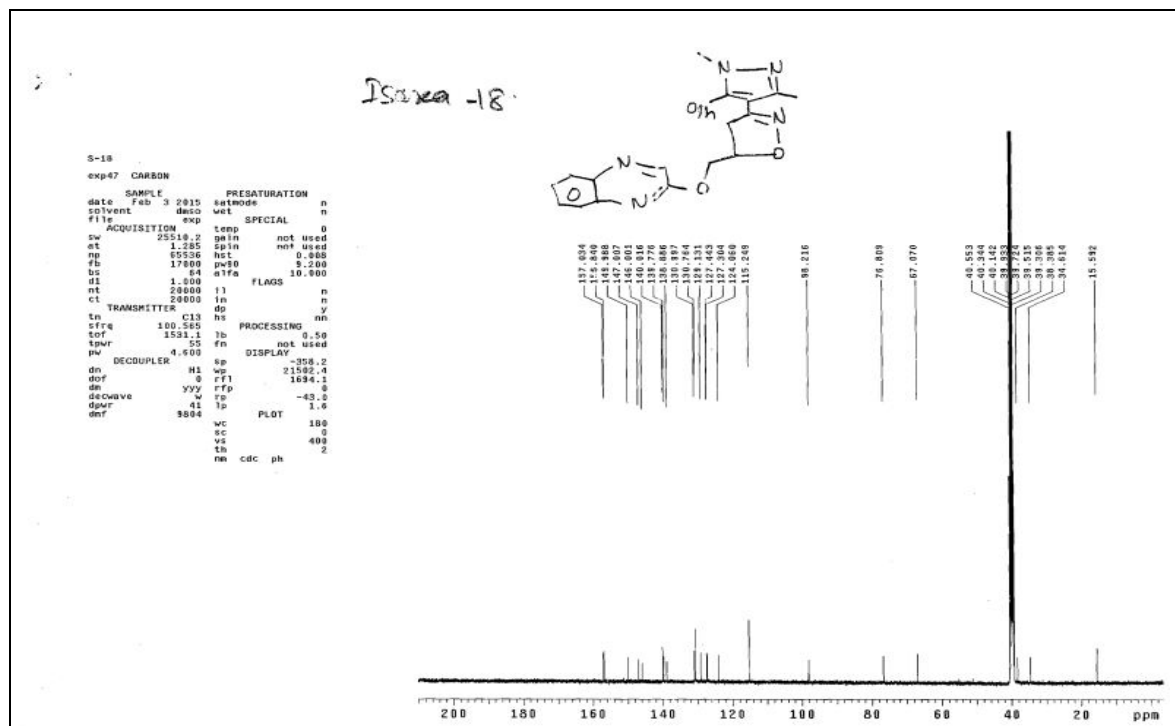

**Fig. S35.**  $^{13}\text{C}$  NMR (75 MHz,  $\text{DMSO-}d_6$ ): 3-(1,3-dimethyl-5-phenoxy-1H-pyrazol-4-yl)-5-((quinoxalin-2-yloxy)methyl)-4,5-dihydroisoxazole (**61**)

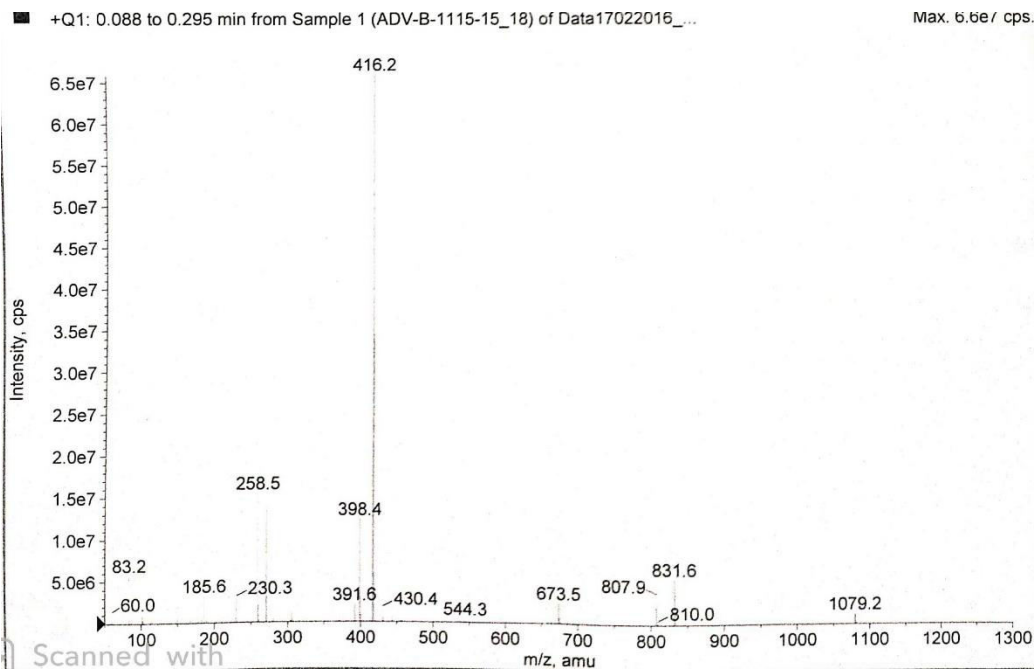

**Fig. S36.** ESI-MS spectra of the compound **61**

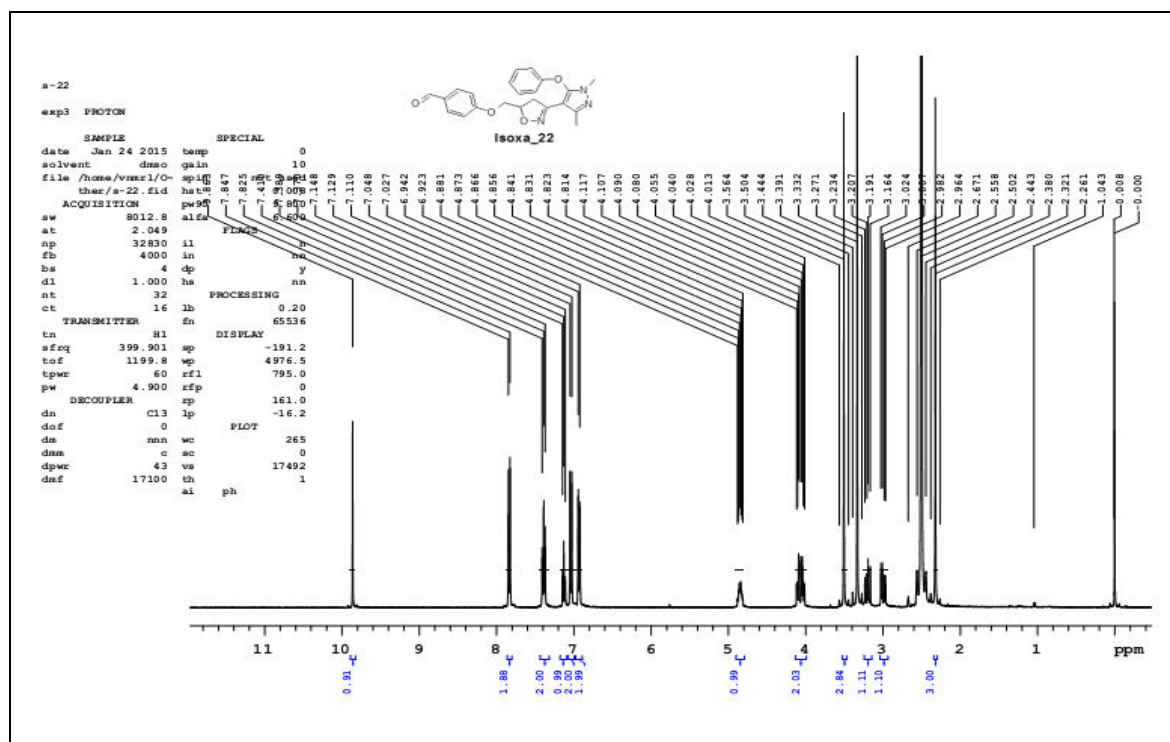

**Fig. S37.**  $^1\text{H}$  NMR (300 MHz,  $\text{DMSO-}d_6$ ): 4-((3-(1,3-dimethyl-5-phenoxy-1H-pyrazol-4-yl)-4,5-dihydroisoxazol-5-yl)methoxy) benzaldehyde (**6m**)

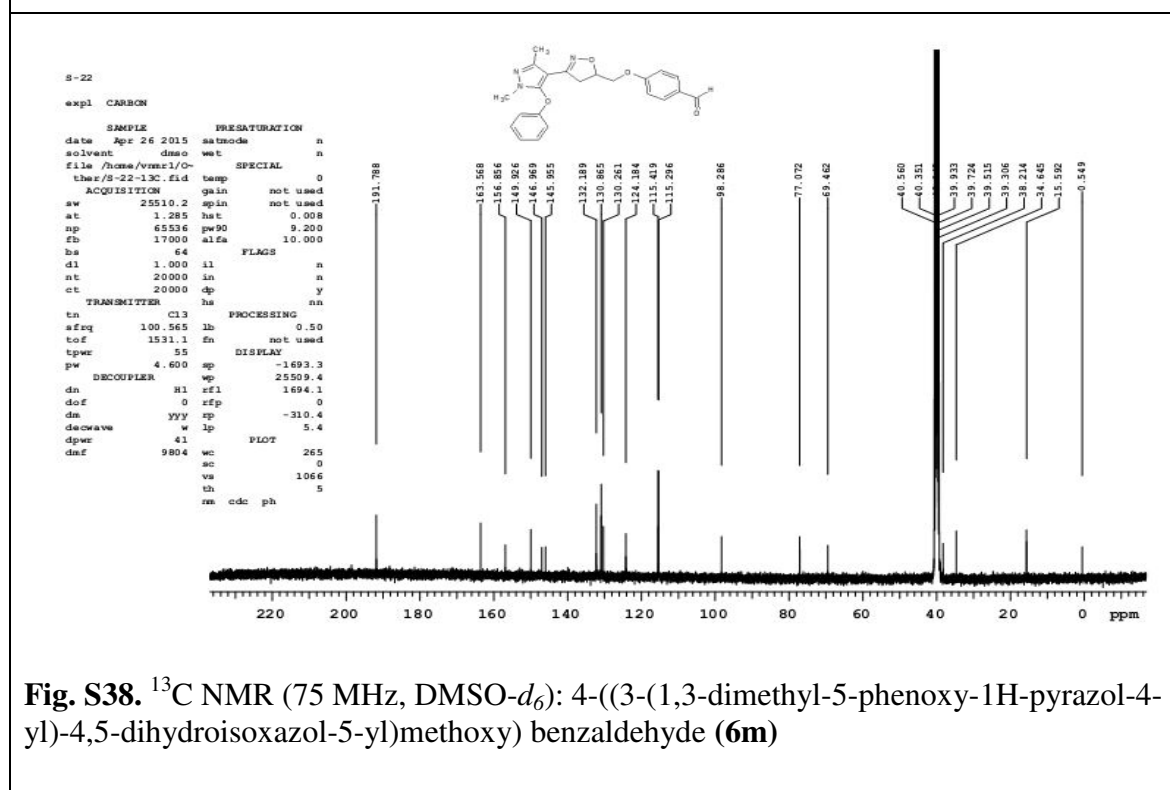

**Fig. S38.**  $^{13}\text{C}$  NMR (75 MHz,  $\text{DMSO-}d_6$ ): 4-((3-(1,3-dimethyl-5-phenoxy-1H-pyrazol-4-yl)-4,5-dihydroisoxazol-5-yl)methoxy) benzaldehyde (**6m**)





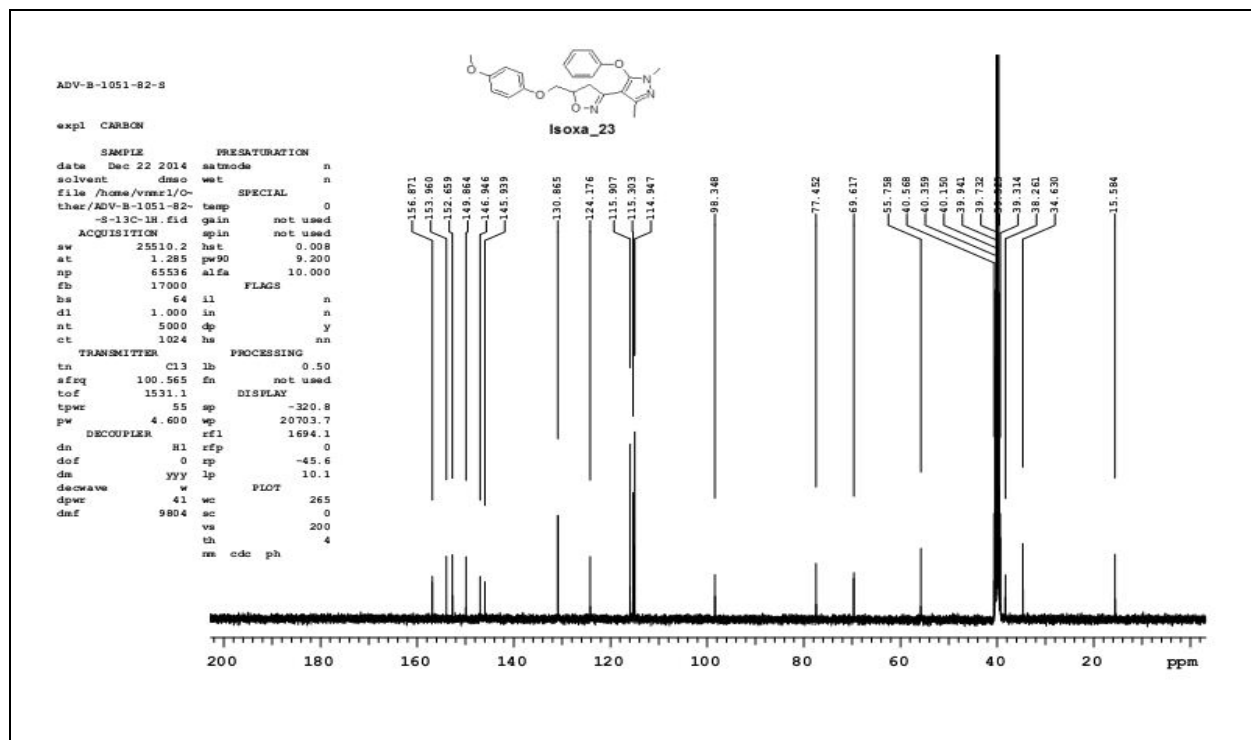

**Fig. S41.**  $^{13}\text{C}$  NMR (75 MHz,  $\text{DMSO-}d_6$ ): 3-(1,3-dimethyl-5-phenoxy-1H-pyrazol-4-yl)-5-((4-methoxyphenoxy)methyl)-4,5-dihydro isoxazole (**6n**)

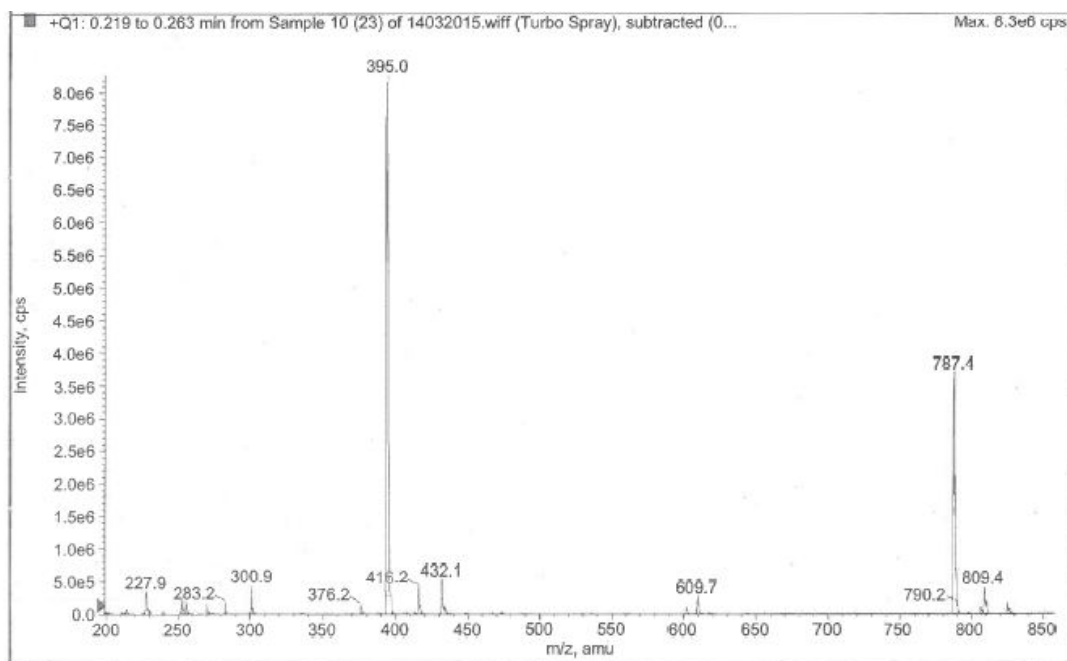

**Fig. S42.** ESI-MS spectra of the compound **6n**



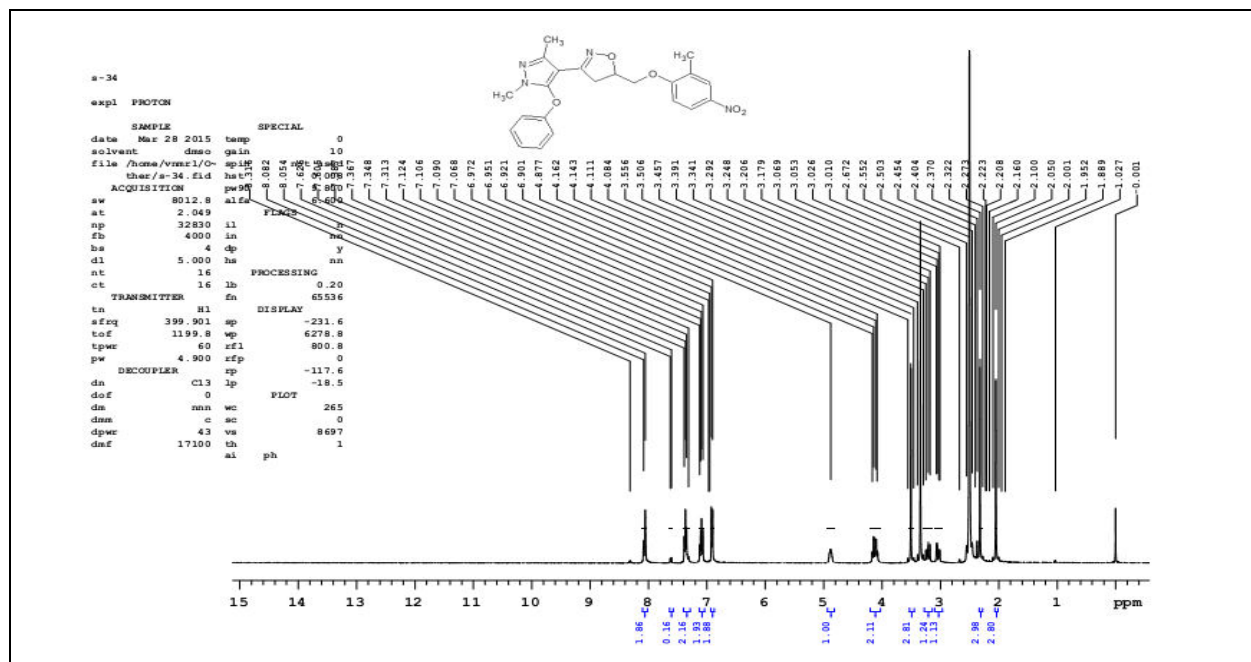

**Fig. S43.**  $^1\text{H}$  NMR (300 MHz,  $\text{DMSO}-d_6$ ): 3-(1,3-dimethyl-5-phenoxy-1H-pyrazol-4-yl)-5-((2-methyl-4-nitrophenoxy)methyl)-4,5-dihydroisoxazole (**60**)

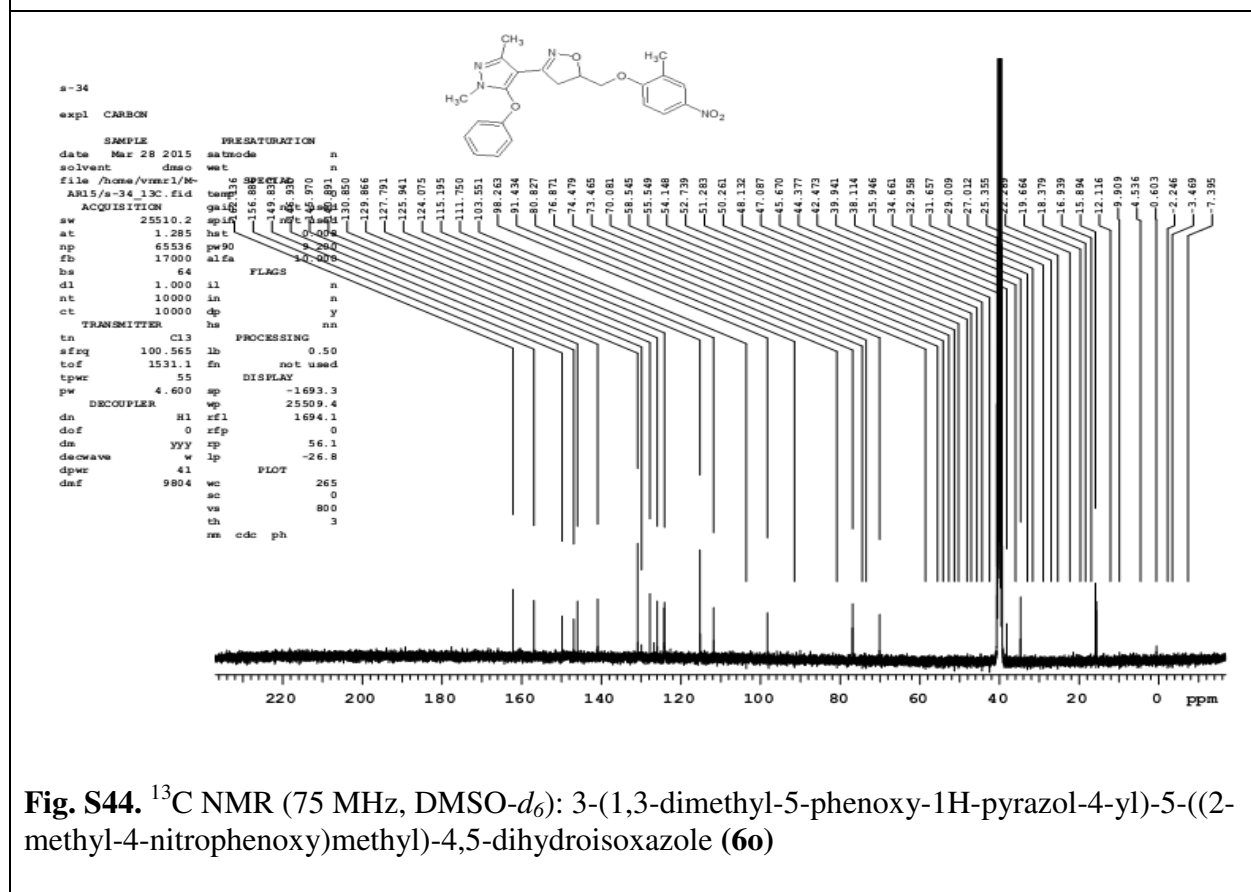

**Fig. S44.**  $^{13}\text{C}$  NMR (75 MHz,  $\text{DMSO}-d_6$ ): 3-(1,3-dimethyl-5-phenoxy-1H-pyrazol-4-yl)-5-((2-methyl-4-nitrophenoxy)methyl)-4,5-dihydroisoxazole (**60**)

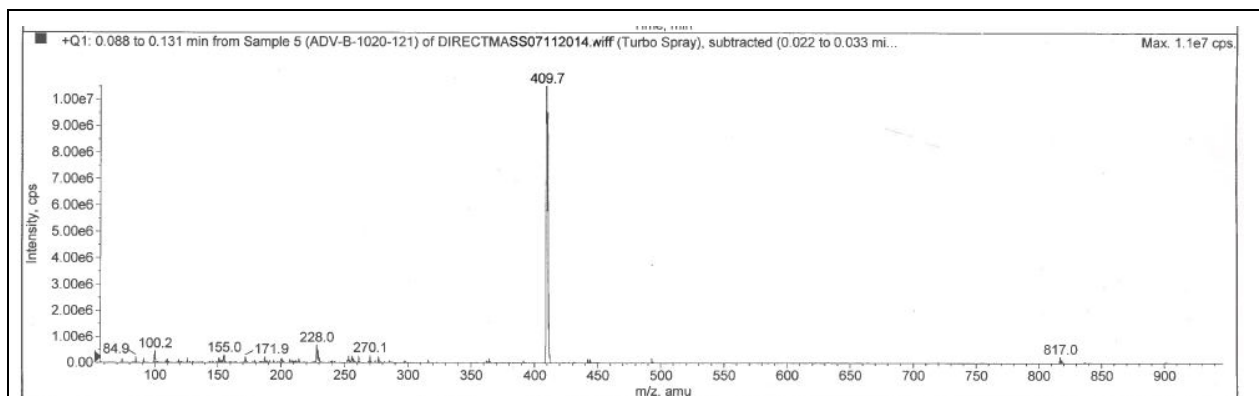

Fig. S45. ESI-MS spectra of the compound **60**

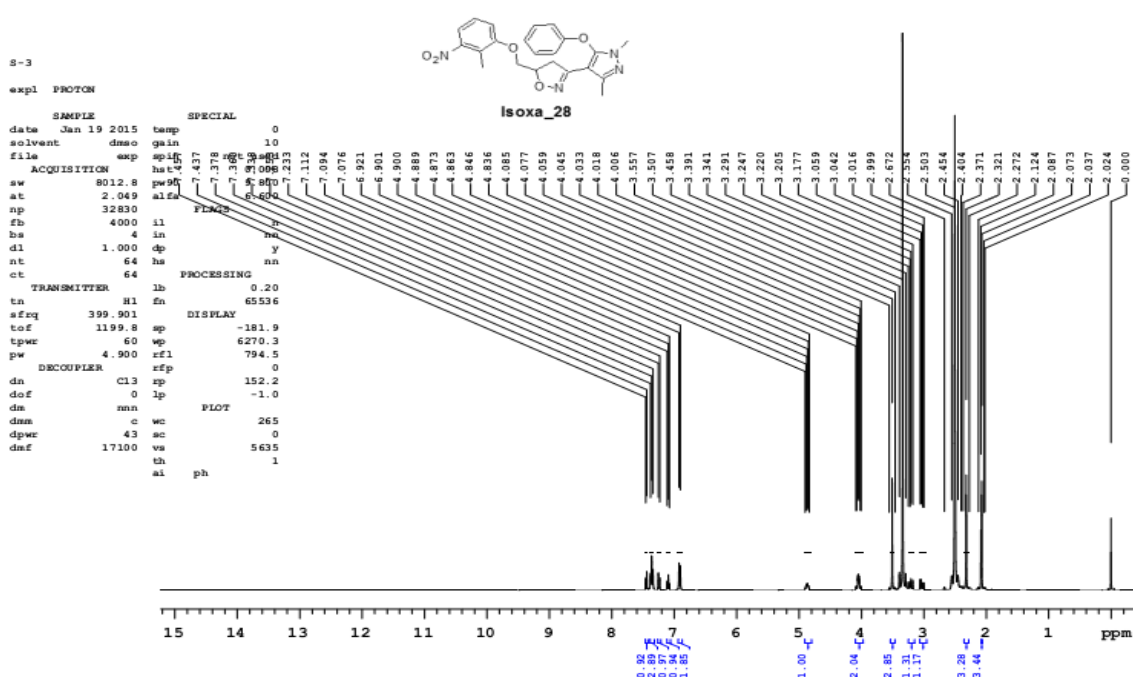

Fig. S46.  $^1\text{H}$  NMR (300 MHz,  $\text{DMSO}-d_6$ ): 3-(1,3-dimethyl-5-phenoxy-1H-pyrazol-4-yl)-5-((2-methyl-3-nitrophenoxy)methyl)-4,5-dihydroisoxazole (**6p**)

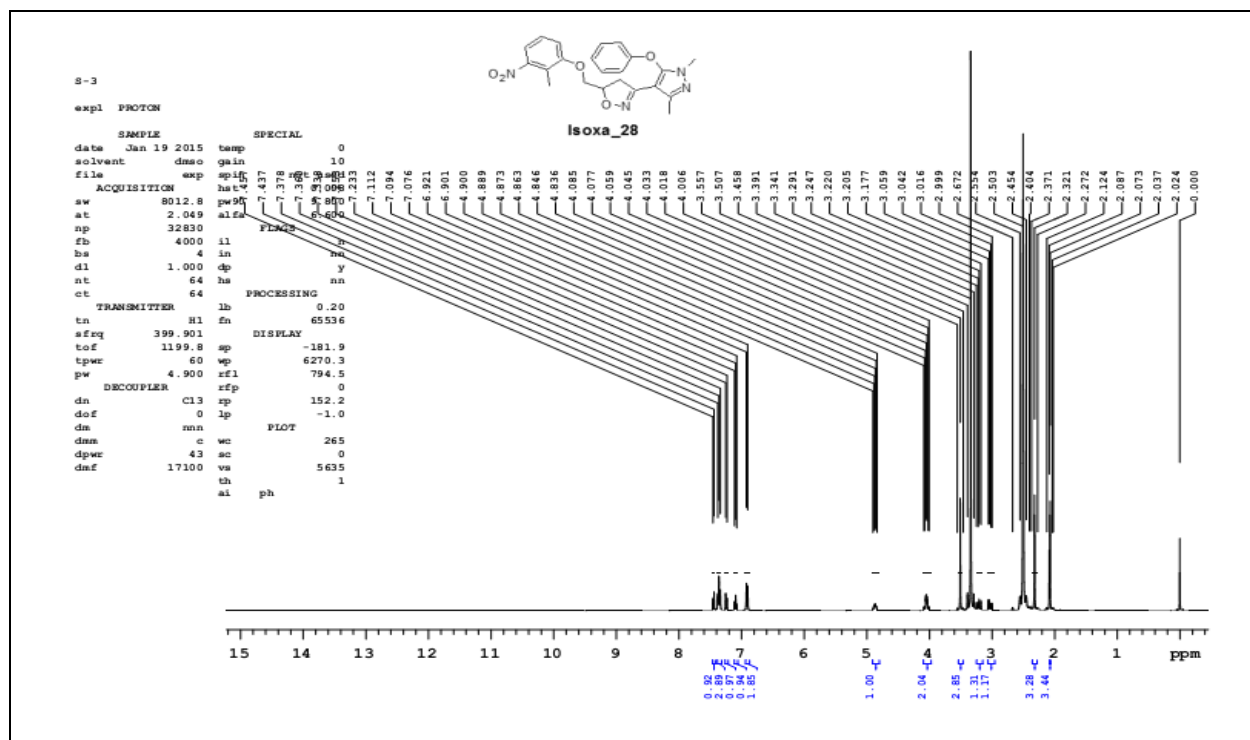

**Fig. S47.**  $^{13}\text{C}$  NMR (75 MHz,  $\text{DMSO}-d_6$ ): 3-(1,3-dimethyl-5-phenoxy-1H-pyrazol-4-yl)-5-((2-methyl-3-nitrophenoxy)methyl)-4,5-dihydroisoxazole (**6p**)

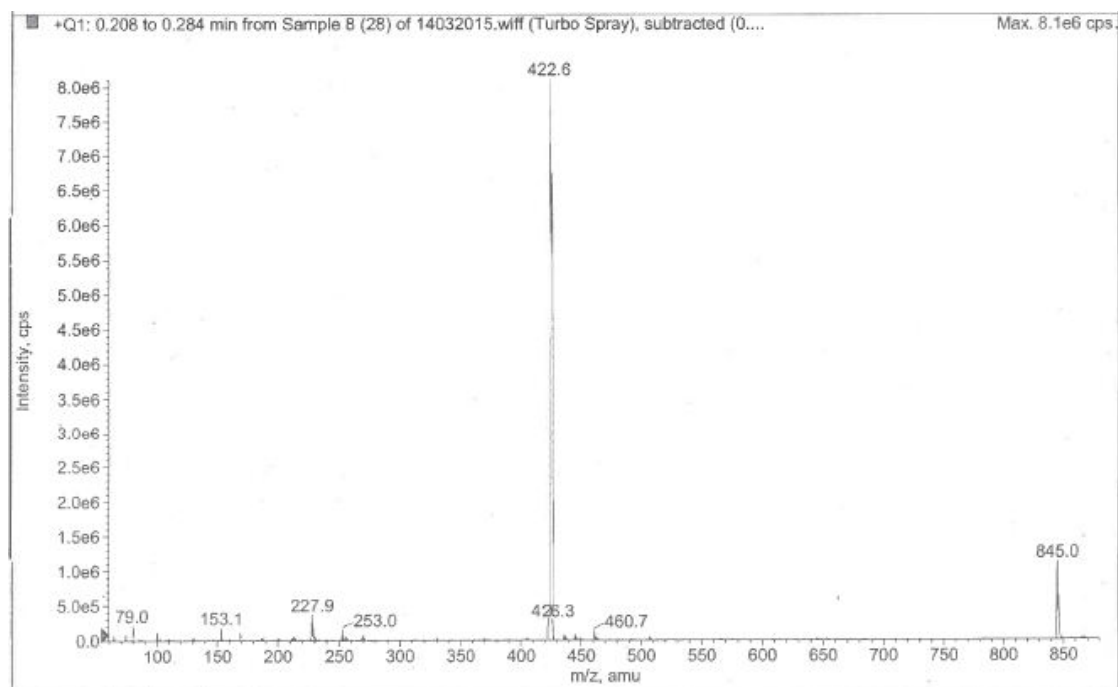

**Fig. S48.** ESI-MS spectra of the compound **6p**

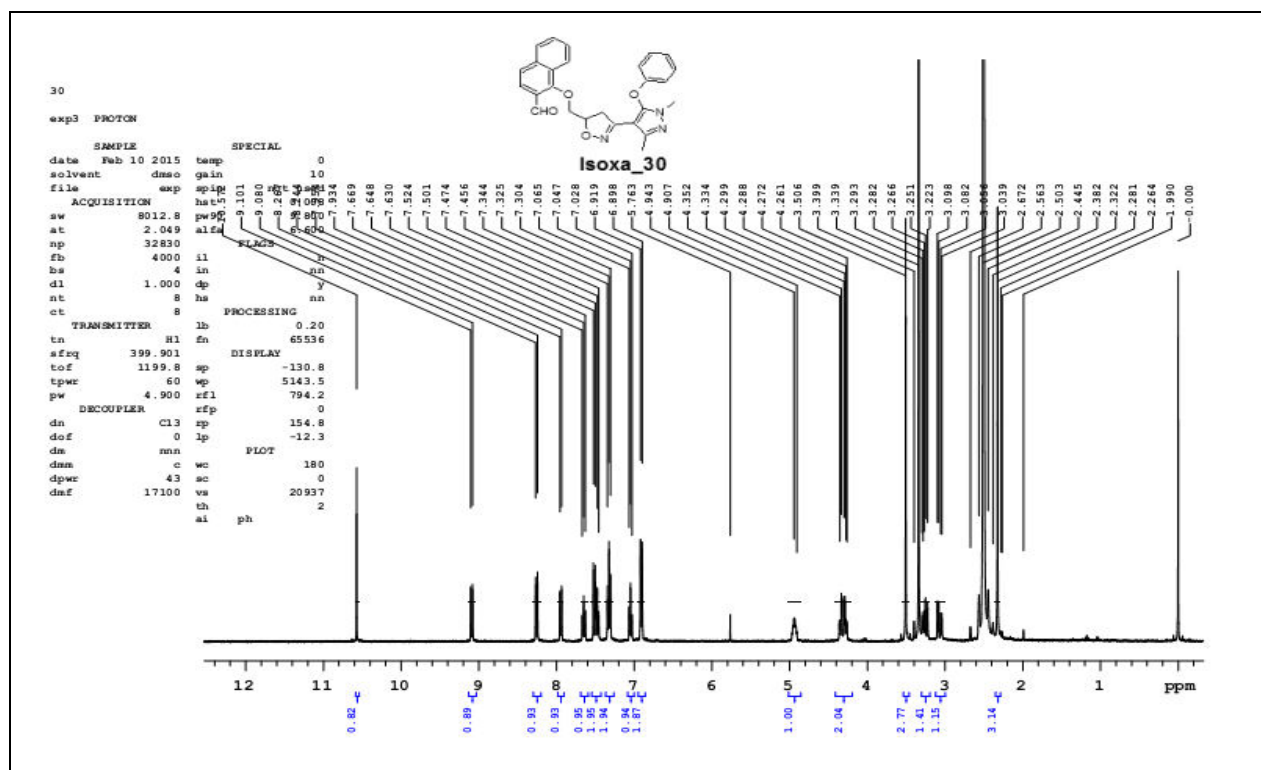

**Fig. S49.**  $^1\text{H}$  NMR (300 MHz,  $\text{DMSO-}d_6$ ): 1-((3-(1,3-dimethyl-5-phenoxy-1H-pyrazol-4-yl)-4,5-dihydroisoxazol-5-yl)methoxy)-2-naphthaldehyde (**6q**)

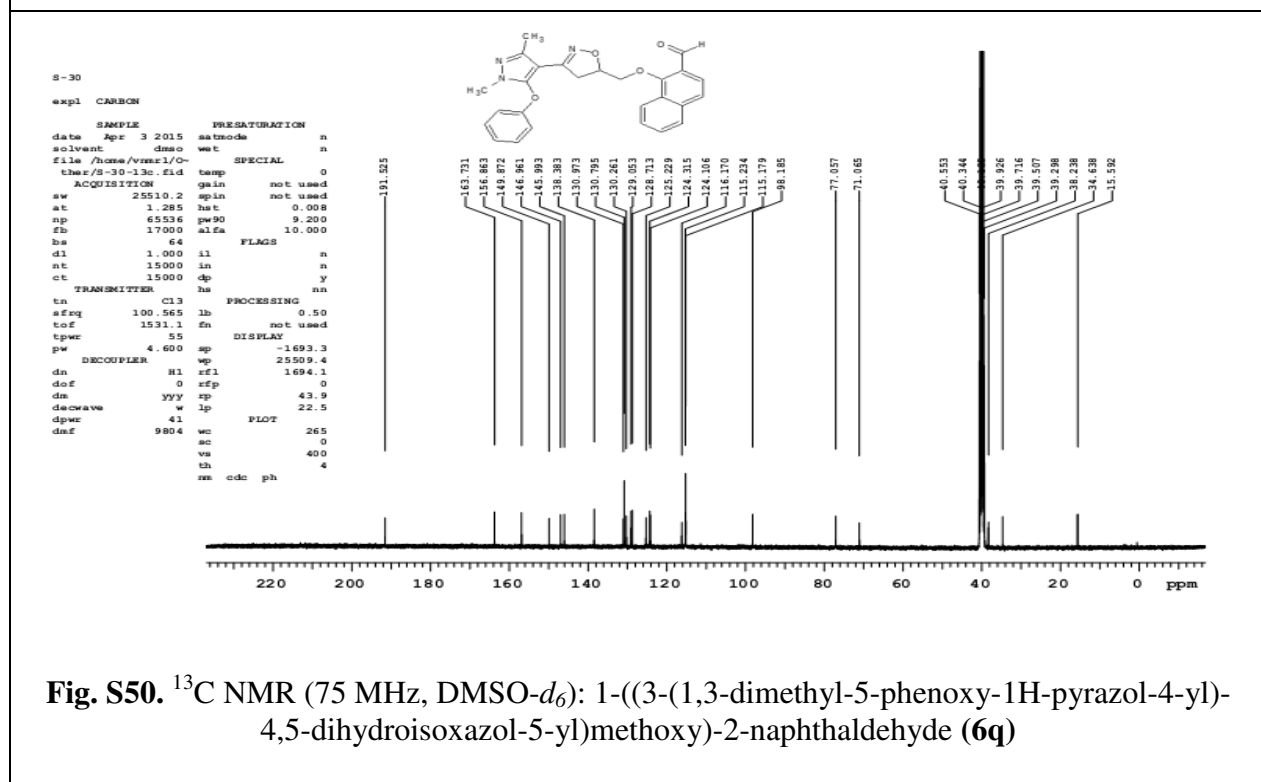

**Fig. S50.**  $^{13}\text{C}$  NMR (75 MHz,  $\text{DMSO-}d_6$ ): 1-((3-(1,3-dimethyl-5-phenoxy-1H-pyrazol-4-yl)-4,5-dihydroisoxazol-5-yl)methoxy)-2-naphthaldehyde (**6q**)

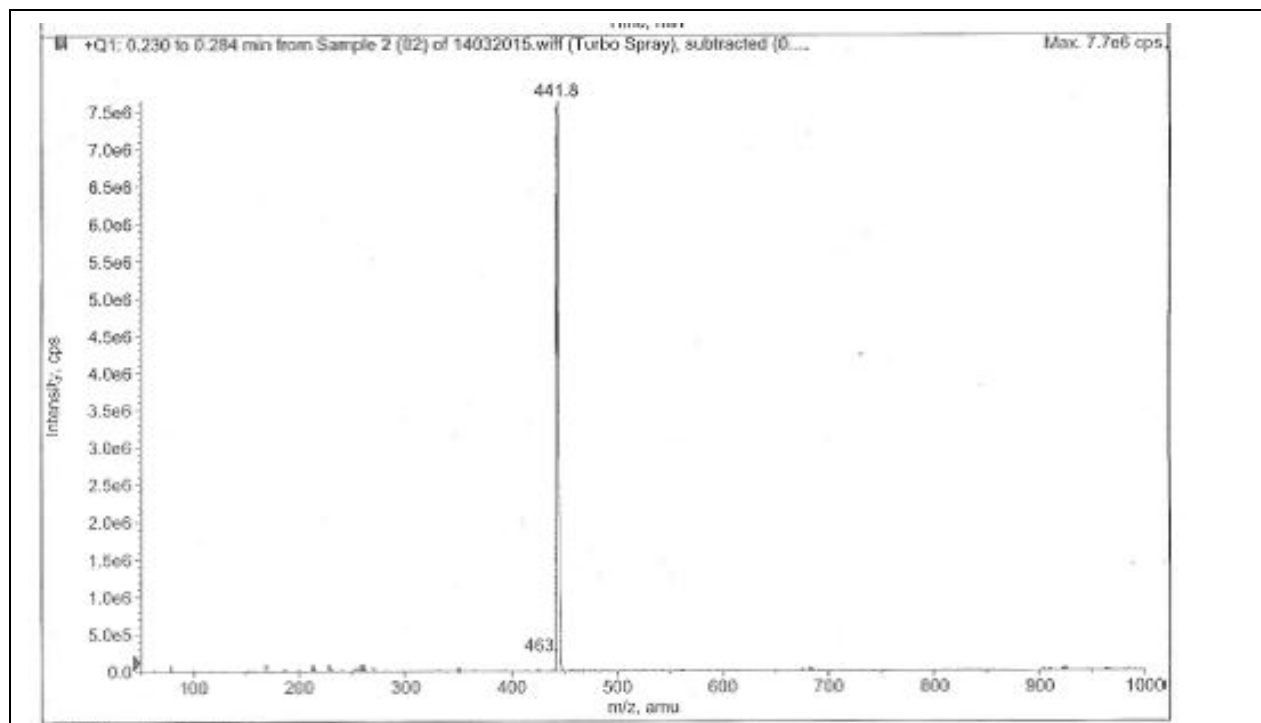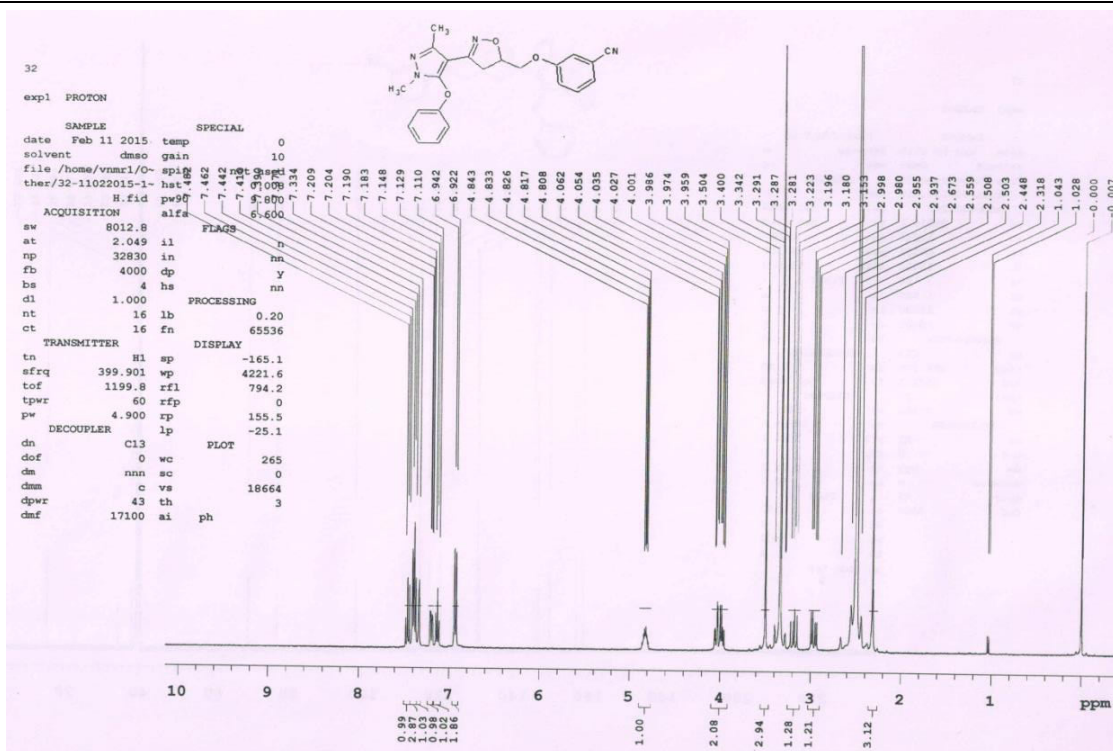

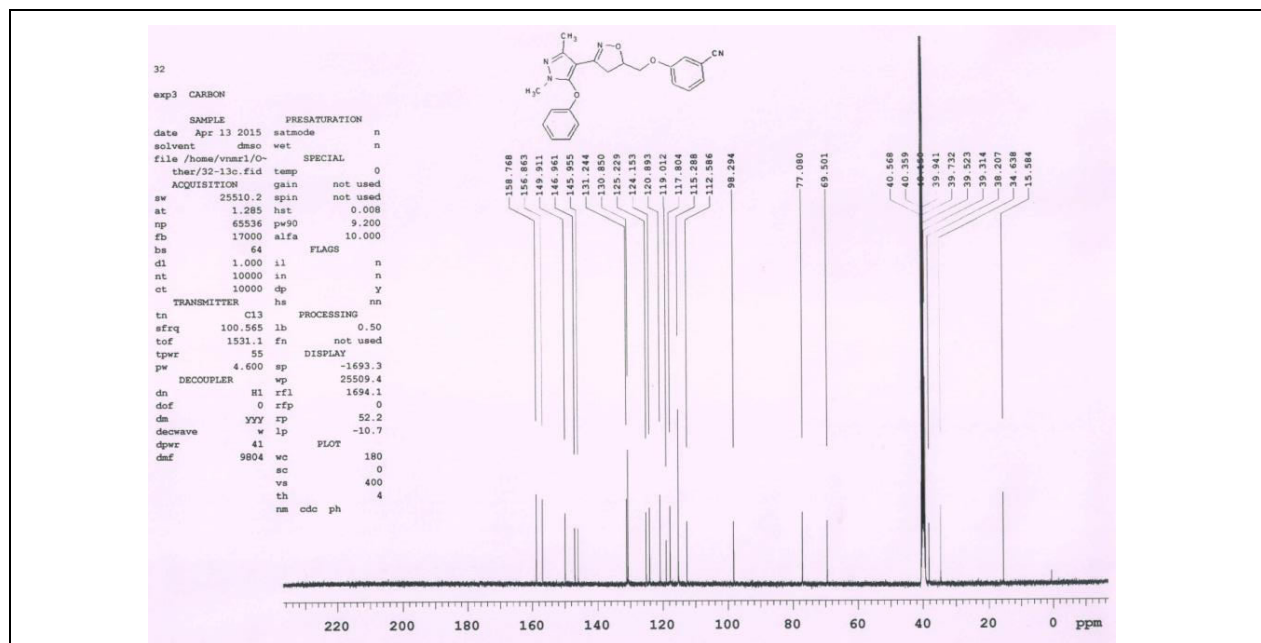

**Fig. S53.**  $^{13}\text{C}$  NMR (75 MHz,  $\text{DMSO-}d_6$ ): 3-((3-(1,3-dimethyl-5-phenoxy-1H-pyrazol-4-yl)-4,5-dihydroisoxazol-5-yl)methoxy)benzonitrile (**6r**)

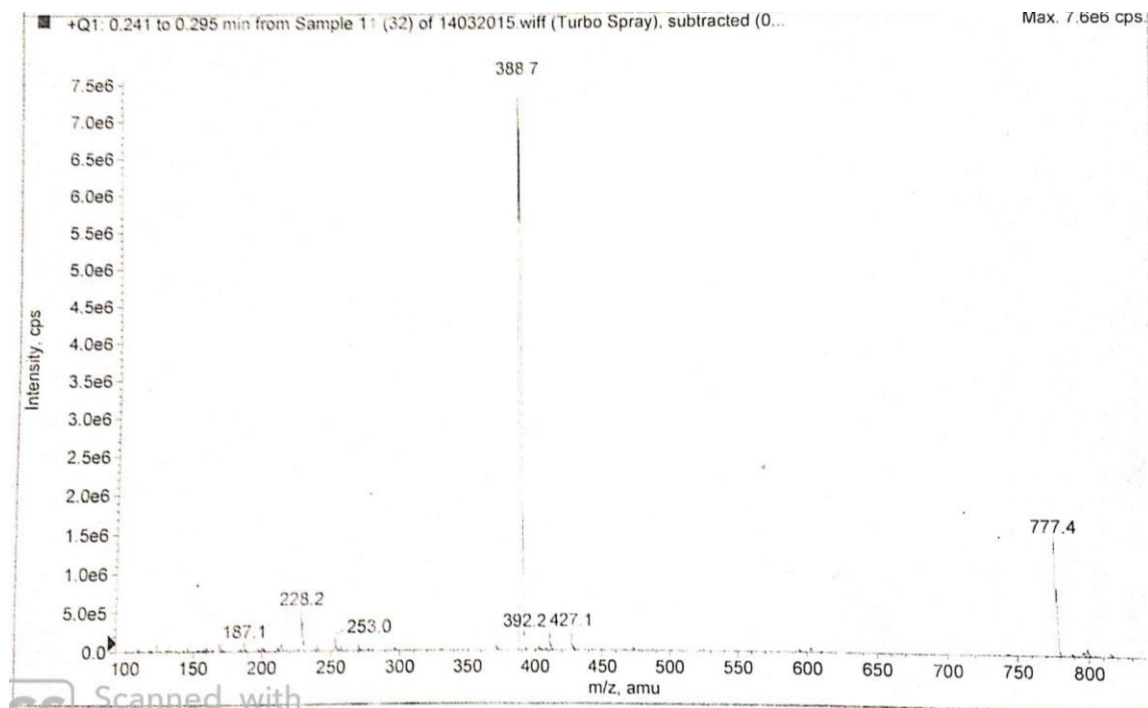

**Fig. S54.** ESI-MS spectra of the compound **6r**



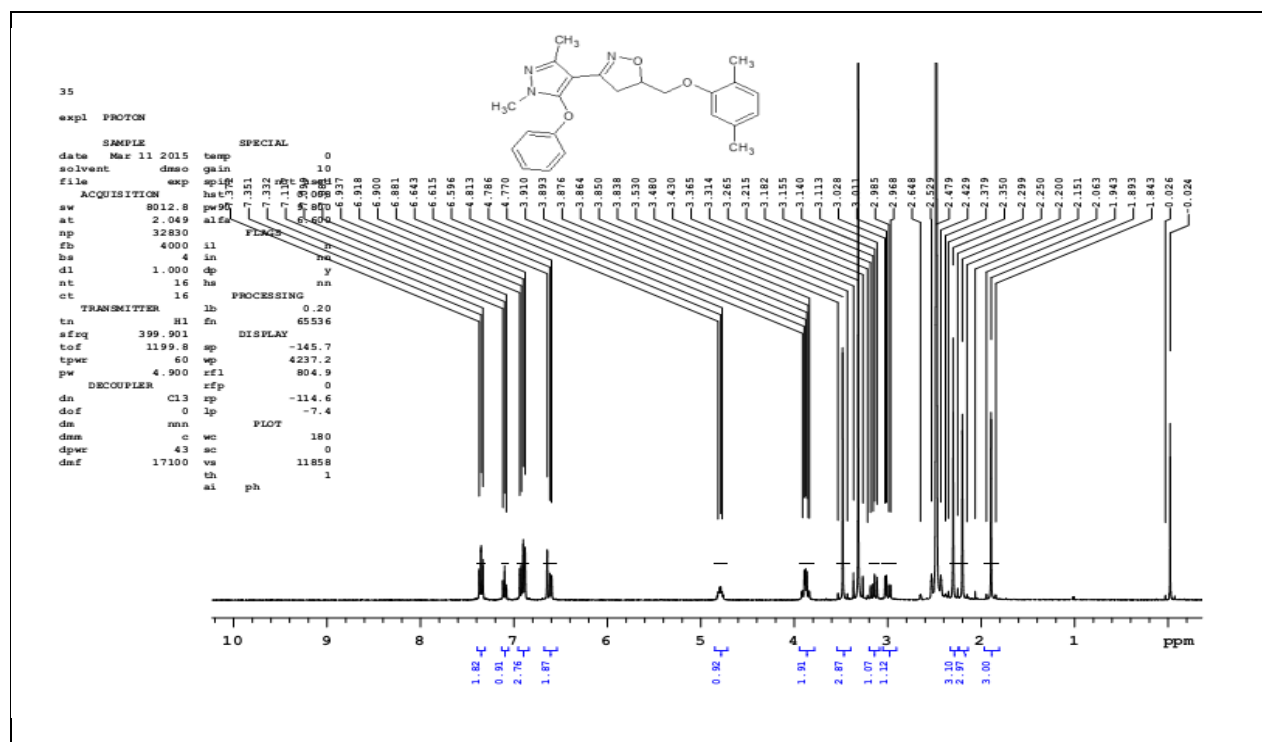

Fig. S55.  $^1\text{H}$  NMR (300 MHz,  $\text{DMSO}-d_6$ ): 3-(1,3-dimethyl-5-phenoxy-1H-pyrazol-4-yl)-5-((2,5-dimethylphenoxy)methyl)-4,5-dihydroisoxazole (**6s**)

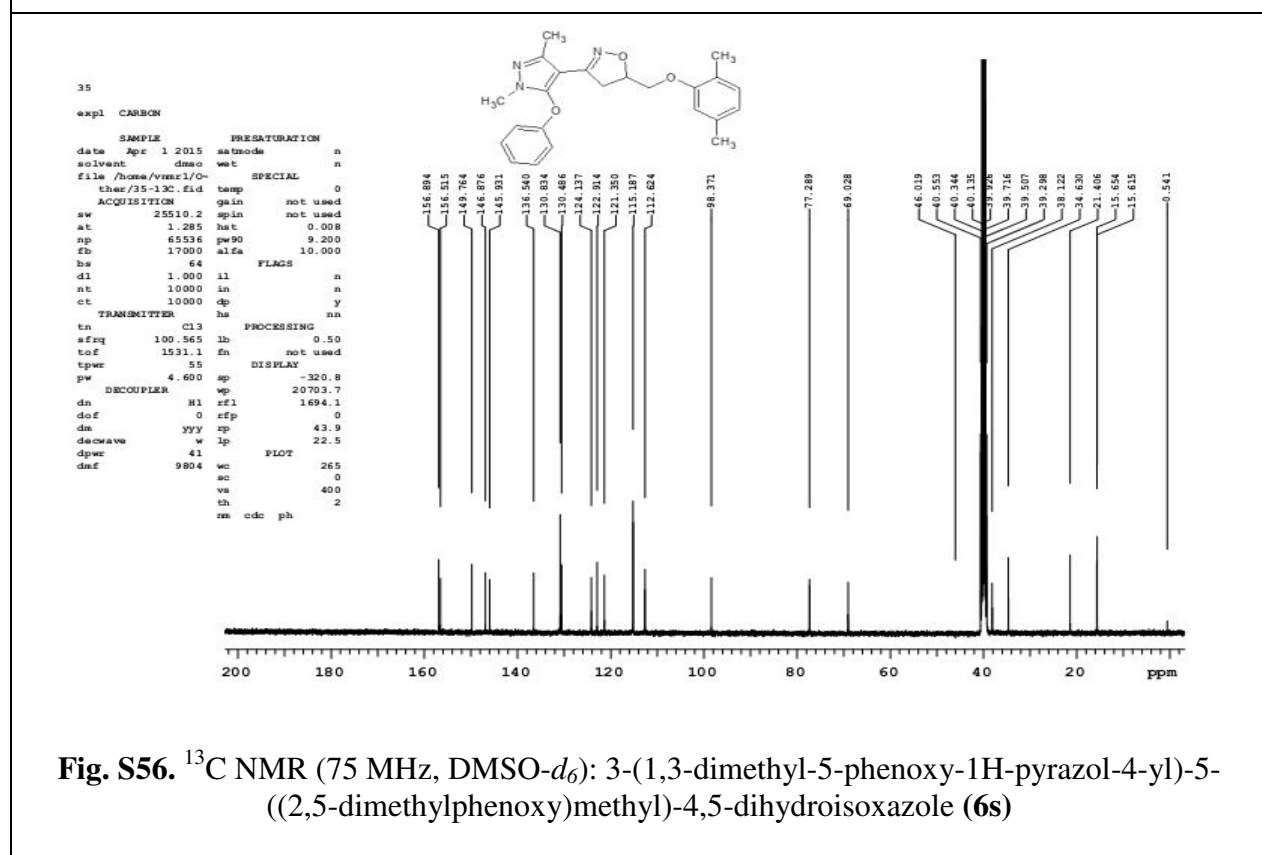

Fig. S56.  $^{13}\text{C}$  NMR (75 MHz,  $\text{DMSO}-d_6$ ): 3-(1,3-dimethyl-5-phenoxy-1H-pyrazol-4-yl)-5-((2,5-dimethylphenoxy)methyl)-4,5-dihydroisoxazole (**6s**)

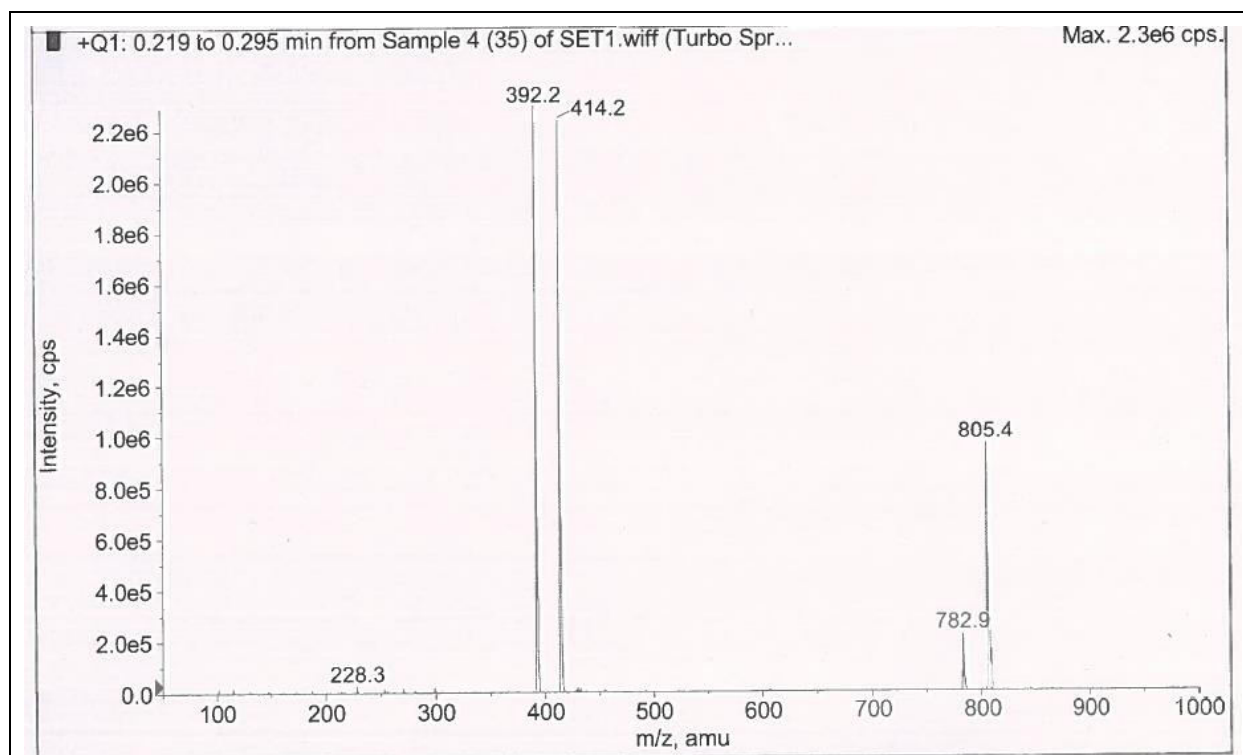

**Fig. S57.** ESI-MS spectra of the compound **6s**



## X-ray crystallographic information

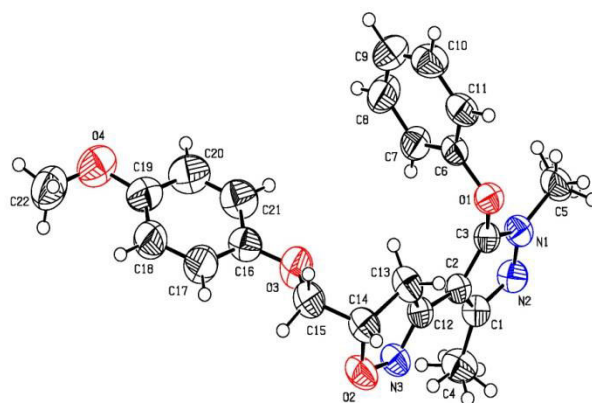

ORTEP diagram of isoxazoline derivative **6n**

Crystallographic Data for **6n** single crystal

|                                             |                                                          |
|---------------------------------------------|----------------------------------------------------------|
| Empirical formula                           | $C_{22}H_{23}N_3O_4$                                     |
| Crystal shape and color                     | Colorless plates                                         |
| Formula weight                              | 393.43                                                   |
| Temperature                                 | 293K                                                     |
| Wavelength                                  | 0.7107 Å                                                 |
| Crystal system & space group                | Monoclinic, $P2_1/c$                                     |
| Cell dimensions                             | $a = 15.715 (2) \text{ \AA}$                             |
|                                             | $b = 15.803 (2) \text{ \AA}$                             |
|                                             | $c = 8.4108 (10) \text{ \AA}$                            |
|                                             | $\alpha, \gamma, \beta = 100.922 (6)^\circ$              |
| Volume                                      | $2050.9 (4) \text{ \AA}^3$                               |
| Z, calculated density                       | 4, 1.274Mg m <sup>-3</sup>                               |
| F(000)                                      | 832                                                      |
| $\theta$ range for data collection          | $1.3^\circ - 27.5^\circ$                                 |
| Absorption coefficient                      | $0.089 \text{ mm}^{-1}$                                  |
| $\Delta\rho_{\max}$ and $\Delta\rho_{\min}$ | $0.17 \text{ e \AA}^{-3}$ and $-0.19 \text{ e \AA}^{-3}$ |
| Refinement method                           | Full matrix least square on $F^2$                        |
| Data/ parameters                            | 4716/262                                                 |
| Goodness-of-fit on $F^2$                    | 1.03                                                     |
| Final R indices [ $I > 2\sigma(I)$ ]        | R1=0.047, wR2= 0.153                                     |
| CCDC NO                                     | 1897410                                                  |

Table.2. Bond lengths of the title molecule

|          |             |          |           |
|----------|-------------|----------|-----------|
| O1—C3    | 1.3622 (18) | C14—C13  | 1.519 (2) |
| O1—C6    | 1.3910 (19) | C14—H14A | 0.97      |
| O2—N3    | 1.4138 (18) | C14—H14B | 0.97      |
| O2—C13   | 1.459 (2)   | C13—C15  | 1.494 (3) |
| O3—C16   | 1.376 (2)   | C13—H13  | 0.98      |
| O3—C15   | 1.421 (2)   | C15—H15A | 0.97      |
| N1—C3    | 1.335 (2)   | C15—H15B | 0.97      |
| N1—N2    | 1.3629 (18) | C16—C17  | 1.368 (3) |
| N1—C5    | 1.451 (2)   | C16—C21  | 1.369 (3) |
| N2—C1    | 1.328 (2)   | C21—C20  | 1.371 (3) |
| N3—C12   | 1.2762 (19) | C21—H21  | 0.93      |
| C22—O4   | 1.416 (3)   | C20—C19  | 1.376 (3) |
| C22—H22A | 0.96        | C20—H20  | 0.93      |
| C22—H22B | 0.96        | C19—C18  | 1.366 (3) |
| C22—H22C | 0.96        | C19—O4   | 1.375 (2) |
| C1—C2    | 1.410 (2)   | C18—C17  | 1.381 (3) |
| C1—C4    | 1.490 (2)   | C18—H18  | 0.93      |
| C2—C3    | 1.377 (2)   | C17—H17  | 0.93      |
| C2—C12   | 1.449 (2)   | C5—H5A   | 0.96      |
| C6—C7    | 1.370 (2)   | C5—H5B   | 0.96      |
| C6—C11   | 1.376 (2)   | C5—H5C   | 0.96      |
| C7—C8    | 1.382 (3)   | C5—H5D   | 0.96      |
| C7—H7    | 0.93        | C5—H5E   | 0.96      |
| C8—C9    | 1.379 (3)   | C5—H5F   | 0.96      |
| C8—H8    | 0.93        | C4—H4A   | 0.96      |
| C9—C10   | 1.367 (3)   | C4—H4B   | 0.96      |
| C9—H9    | 0.93        | C4—H4C   | 0.96      |
| C10—C11  | 1.377 (3)   | C4—H4D   | 0.96      |
| C10—H10  | 0.93        | C4—H4E   | 0.96      |
| C12—C14  | 1.495 (2)   | C4—H4F   | 0.96      |

Table.3. Bond Angles of the title compound

|               |             |             |             |
|---------------|-------------|-------------|-------------|
| C3—O1—C6      | 118.12 (11) | C17—C16—C21 | 118.74 (19) |
| N3—O2—C13     | 109.72 (11) | C17—C16—O3  | 125.14 (17) |
| C16—O3—C15    | 117.72 (13) | C21—C16—O3  | 116.10 (17) |
| C3—N1—N2      | 110.91 (12) | C16—C21—C20 | 120.6 (2)   |
| C3—N1—C5      | 128.05 (15) | C16—C21—H21 | 119.7       |
| N2—N1—C5      | 121.04 (14) | C20—C21—H21 | 119.7       |
| C1—N2—N1      | 105.31 (13) | C21—C20—C19 | 120.88 (19) |
| C12—N3—O2     | 109.28 (12) | C21—C20—H20 | 119.6       |
| O4—C22—H22A   | 109.5       | C19—C20—H20 | 119.6       |
| O4—C22—H22B   | 109.5       | C18—C19—O4  | 125.2 (2)   |
| H22A—C22—H22B | 109.5       | C18—C19—C20 | 118.6 (2)   |
| O4—C22—H22C   | 109.5       | O4—C19—C20  | 116.15 (19) |
| H22A—C22—H22C | 109.5       | C19—C18—C17 | 120.4 (2)   |
| H22B—C22—H22C | 109.5       | C19—C18—H18 | 119.8       |
| N2—C1—C2      | 111.45 (14) | C17—C18—H18 | 119.8       |
| N2—C1—C4      | 119.88 (14) | C16—C17—C18 | 120.82 (19) |
| C2—C1—C4      | 128.67 (14) | C16—C17—H17 | 119.6       |
| C3—C2—C1      | 103.61 (13) | C18—C17—H17 | 119.6       |
| C3—C2—C12     | 125.86 (14) | C19—O4—C22  | 117.64 (18) |
| C1—C2—C12     | 130.52 (14) | N1—C5—H5A   | 109.5       |
| N1—C3—O1      | 120.28 (13) | N1—C5—H5B   | 109.5       |
| N1—C3—C2      | 108.73 (13) | H5A—C5—H5B  | 109.5       |
| O1—C3—C2      | 130.89 (14) | N1—C5—H5C   | 109.5       |
| C7—C6—C11     | 121.52 (16) | H5A—C5—H5C  | 109.5       |
| C7—C6—O1      | 123.35 (14) | H5B—C5—H5C  | 109.5       |
| C11—C6—O1     | 115.13 (14) | N1—C5—H5D   | 109.5       |
| C6—C7—C8      | 118.60 (17) | H5A—C5—H5D  | 141.1       |
| C6—C7—H7      | 120.7       | H5B—C5—H5D  | 56.3        |
| C8—C7—H7      | 120.7       | H5C—C5—H5D  | 56.3        |
| C9—C8—C7      | 120.6 (2)   | N1—C5—H5E   | 109.5       |
| C9—C8—H8      | 119.7       | H5A—C5—H5E  | 56.3        |
| C7—C8—H8      | 119.7       | H5B—C5—H5E  | 141.1       |
| C10—C9—C8     | 119.6 (2)   | H5C—C5—H5E  | 56.3        |
| C10—C9—H9     | 120.2       | H5D—C5—H5E  | 109.5       |
| C8—C9—H9      | 120.2       | N1—C5—H5F   | 109.5       |
| C9—C10—C11    | 120.66 (18) | H5A—C5—H5F  | 56.3        |
| C9—C10—H10    | 119.7       | H5B—C5—H5F  | 56.3        |
| C11—C10—H10   | 119.7       | H5C—C5—H5F  | 141.1       |
| C6—C11—C10    | 118.93 (18) | H5D—C5—H5F  | 109.5       |
| C6—C11—H11    | 120.5       | H5E—C5—H5F  | 109.5       |

|               |             |            |       |
|---------------|-------------|------------|-------|
| C10—C11—H11   | 120.5       | C1—C4—H4A  | 109.5 |
| N3—C12—C2     | 121.50 (14) | C1—C4—H4B  | 109.5 |
| N3—C12—C14    | 114.36 (14) | H4A—C4—H4B | 109.5 |
| C2—C12—C14    | 124.14 (13) | C1—C4—H4C  | 109.5 |
| C12—C14—C13   | 101.54 (13) | H4A—C4—H4C | 109.5 |
| C12—C14—H14A  | 111.5       | H4B—C4—H4C | 109.5 |
| C13—C14—H14A  | 111.5       | C1—C4—H4D  | 109.5 |
| C12—C14—H14B  | 111.5       | H4A—C4—H4D | 141.1 |
| C13—C14—H14B  | 111.5       | H4B—C4—H4D | 56.3  |
| H14A—C14—H14B | 109.3       | H4C—C4—H4D | 56.3  |
| O2—C13—C15    | 108.69 (14) | C1—C4—H4E  | 109.5 |
| O2—C13—C14    | 104.80 (13) | H4A—C4—H4E | 56.3  |
| C15—C13—C14   | 116.14 (16) | H4B—C4—H4E | 141.1 |
| O2—C13—H13    | 109         | H4C—C4—H4E | 56.3  |
| C15—C13—H13   | 109         | H4D—C4—H4E | 109.5 |
| C14—C13—H13   | 109         | C1—C4—H4F  | 109.5 |
| O3—C15—C13    | 108.44 (14) | H4A—C4—H4F | 56.3  |
| O3—C15—H15A   | 110         | H4B—C4—H4F | 56.3  |
| C13—C15—H15A  | 110         | H4C—C4—H4F | 141.1 |
| O3—C15—H15B   | 110         | H4D—C4—H4F | 109.5 |
| C13—C15—H15B  | 110         | H4E—C4—H4F | 109.5 |

Table.4. Torsion angles of the compound

|               |              |                 |              |
|---------------|--------------|-----------------|--------------|
| C3—N1—N2—C1   | -0.04 (17)   | O2—N3—C12—C2    | 179.59 (14)  |
| C5—N1—N2—C1   | 179.47 (15)  | O2—N3—C12—C14   | 0.62 (19)    |
| C13—O2—N3—C12 | 3.02 (18)    | C3—C2—C12—N3    | 179.79 (15)  |
| N1—N2—C1—C2   | -0.16 (18)   | C1—C2—C12—N3    | -1.8 (3)     |
| N1—N2—C1—C4   | -179.59 (14) | C3—C2—C12—C14   | -1.3 (3)     |
| N2—C1—C2—C3   | 0.29 (18)    | C1—C2—C12—C14   | 177.10 (16)  |
| C4—C1—C2—C3   | 179.66 (16)  | N3—C12—C14—C13  | -3.7 (2)     |
| N2—C1—C2—C12  | -178.41 (15) | C2—C12—C14—C13  | 177.34 (15)  |
| C4—C1—C2—C12  | 1.0 (3)      | N3—O2—C13—C15   | 119.60 (14)  |
| N2—N1—C3—O1   | 176.84 (13)  | N3—O2—C13—C14   | -5.17 (18)   |
| C5—N1—C3—O1   | -2.6 (2)     | C12—C14—C13—O2  | 5.06 (18)    |
| N2—N1—C3—C2   | 0.23 (17)    | C12—C14—C13—C15 | -114.87 (16) |
| C5—N1—C3—C2   | -179.24 (15) | C16—O3—C15—C13  | 174.63 (15)  |
| C6—O1—C3—N1   | 90.33 (17)   | O2—C13—C15—O3   | -72.19 (18)  |
| C6—O1—C3—C2   | -93.91 (19)  | C14—C13—C15—O3  | 45.6 (2)     |
| C1—C2—C3—N1   | -0.31 (17)   | C15—O3—C16—C17  | -22.5 (3)    |
| C12—C2—C3—N1  | 178.48 (14)  | C15—O3—C16—C21  | 159.36 (18)  |
| C1—C2—C3—O1   | -176.44 (15) | C17—C16—C21—C20 | -0.1 (3)     |
| C12—C2—C3—O1  | 2.3 (3)      | O3—C16—C21—C20  | 178.15 (19)  |
| C3—O1—C6—C7   | 6.1 (2)      | C16—C21—C20—C19 | -0.5 (3)     |
| C3—O1—C6—C11  | -174.30 (14) | C21—C20—C19—C18 | 0.1 (3)      |
| C11—C6—C7—C8  | 0.6 (3)      | C21—C20—C19—O4  | 179.71 (19)  |
| O1—C6—C7—C8   | -179.77 (17) | O4—C19—C18—C17  | -178.6 (2)   |
| C6—C7—C8—C9   | -0.6 (3)     | C20—C19—C18—C17 | 0.9 (3)      |
| C7—C8—C9—C10  | 0.3 (4)      | C21—C16—C17—C18 | 1.2 (3)      |
| C8—C9—C10—C11 | 0.0 (3)      | O3—C16—C17—C18  | -176.9 (2)   |
| C7—C6—C11—C10 | -0.3 (3)     | C19—C18—C17—C16 | -1.6 (4)     |
| O1—C6—C11—C10 | -179.95 (15) | C18—C19—O4—C22  | -4.1 (3)     |
| C9—C10—C11—C6 | 0.0 (3)      | C20—C19—O4—C22  | 176.29 (19)  |

Table.5. Hydrogen bonding geometry of the molecule.

| <b>D—H...A</b><br>(Å, °) | <b>(D—H)</b><br>(Å) | <b>(H...A)</b><br>(Å) | <b>(D...A)</b><br>(Å) | <b>(D—H...A)</b><br>(°) |
|--------------------------|---------------------|-----------------------|-----------------------|-------------------------|
| C11—H11...N3             | 0.93                | 2.46                  | 3.306                 | 151                     |
| C7—H7...O4               | 0.93                | 2.62                  | 3.398                 | 140                     |
